# Supplementary material for: One-pot synthesis of α-iodoketones from alcohols using ammonium iodide and Oxone® in water
Source: Royal Society of Chemistry journal article supplement (doi:10.1039/c4ra16130k), 2015-01-01
Supplement: c4ra16130k1.pdf [file c4ra16130k1.pdf]

## Supporting Information

### **One-pot synthesis of $\alpha$ -iodoketones from alcohols using ammonium iodide and Oxone<sup>®</sup> in water**

**Marri Mahender Reddy<sup>a</sup>, Peraka Swamy<sup>a,b</sup>, Mamedu Naresh<sup>a,b</sup>, Kodumuri Srujana<sup>a</sup>, Chevella Durgaiiah<sup>a</sup>, Tumula Venkateshwar Rao<sup>a</sup> and Nama Narendra<sup>a,b\*</sup>**

<sup>a</sup> *I&PC Division, CSIR-Indian Institute of Chemical Technology, Hyderabad 500 007, India. E-mail: narendern33@yahoo.co.in; Fax: +91-40-27160387/27160757; Tel: +91-40-27191703*

<sup>b</sup> *Academy of Scientific and Innovative Research, India*

#### **Table of contents**

**General information.....S2**

**General procedure.....S2**

**<sup>1</sup>H, <sup>13</sup>C NMR and Mass Spectral data.....S2-S5**

**Copies of <sup>1</sup>H and <sup>13</sup>C NMR Spectra .....S6-S21**

**References.....S22**

## General information

All chemicals used were reagent grade and used as received without further purification.  $^1\text{H}$  NMR spectra were recorded at 300, 400 and 500 MHz and  $^{13}\text{C}$  NMR spectra 75 MHz in  $\text{CDCl}_3$ . The chemical shifts ( $\delta$ ) are reported in ppm units relative to TMS as an internal standard for  $^1\text{H}$  NMR and  $\text{CDCl}_3$  for  $^{13}\text{C}$  NMR spectra. Coupling constants ( $J$ ) are reported in hertz (Hz) and multiplicities are indicated as follows: s (singlet), d (doublet), dd (doublet of doublet), t (triplet), q (quartet), and m (multiplet). Mass spectra were recorded under impact (EI) conditions at 70 eV. Column chromatography was carried out using silica gel (230-400 mesh).

## General procedure

Oxone® (2.2 mmol) was slowly added to a well stirred solution of  $\text{NH}_4\text{I}$  (2.2 mmol) and alcohol (2 mmol) in water (10 ml) and the reaction mixture was allowed to stir at 70 °C. After disappearance of alcohol (reaction was monitored by TLC) or after the appropriate time, the organic product mixture was extracted with DCM (3 x 25 mL). The organic layer was washed with 5% aqueous sodium thiosulfate solution (10 mL) and dried over anhydrous  $\text{Na}_2\text{SO}_4$ . The solvent was removed in vacuo and the residue was purified by column chromatography over silica gel using n-hexane-ethyl acetate as eluent to give desired products. All the products were identified by their  $^1\text{H}$  NMR,  $^{13}\text{C}$  NMR and mass spectra.

## **<sup>1</sup>H, <sup>13</sup>C NMR and Mass Spectral data**

### **2-Iodo-1-phenylethanone<sup>1</sup> (Table 2, entry 1)**

<sup>1</sup>H NMR (300 MHz, CDCl<sub>3</sub>):  $\delta$  = 4.31 (s, 2H), 7.43-7.59 (m, 3H), 7.91-8.0 (m, 2H).

<sup>13</sup>C NMR (75 MHz, CDCl<sub>3</sub>):  $\delta$  = 1.6, 128.8, 130.0, 133.4, 133.7, 192.8.

MS (EI):  $m/z$  (%) = 246 (M<sup>+</sup>) (10), 105 (100), 91 (32), 77 (41), 51 (33).

### **2-Iodo-1-(4-methylphenyl)ethanone<sup>1</sup> (Table 2, entry 2)**

<sup>1</sup>H NMR (300 MHz, CDCl<sub>3</sub>):  $\delta$  = 2.43 (s, 3H), 4.29 (s, 2H), 7.19-7.31 (m, 2H) 7.81-7.91 (m, 2H).

<sup>13</sup>C NMR (75 MHz, CDCl<sub>3</sub>):  $\delta$  = 1.9, 21.8, 129.1, 129.5, 130.9, 144.8, 192.5.

### **1-(4-Bromophenyl)-2-iodoethanone<sup>1</sup> (Table 2, entry 4)**

<sup>1</sup>H NMR (300 MHz, CDCl<sub>3</sub>):  $\delta$  = 4.26 (s, 2H), 7.62 (d,  $J$  = 8.40 Hz, 2H), 7.84 (d,  $J$  = 8.40 Hz, 2H).

<sup>13</sup>C NMR (75 MHz, CDCl<sub>3</sub>):  $\delta$  = 1.1, 129.0, 130.4, 132.1, 191.8.

MS (EI):  $m/z$  (%) = 324 (M<sup>+</sup>) (15), 183 (100), 169 (21), 90 (62), 50 (92).

### **1-(4-Fluorophenyl)-2-iodoethanone<sup>1</sup> (Table 2, entry 5)**

<sup>1</sup>H NMR (300 MHz, CDCl<sub>3</sub>):  $\delta$  = 4.27 (s, 2H), 7.11-7.19 (m, 2H), 7.96-8.05 (m, 2H).

<sup>13</sup>C NMR (75 MHz, CDCl<sub>3</sub>):  $\delta$  = 1.3, 115.9 (d,  $J_{CF}$  = 22.0 Hz), 129.8, 131.7 (d,  $J_{CF}$  = 9.9 Hz), 165.9 (d,  $J_{CF}$  = 256.4 Hz), 191.3.

### **2-Iodo-1-(4-nitrophenyl)ethanone<sup>1</sup> (Table 2, entry 6)**

<sup>1</sup>H NMR (300 MHz, CDCl<sub>3</sub>)  $\delta$  = 4.34 (s, 2H), 8.14 (d,  $J$  = 8.8 Hz, 2H), 8.33 (d,  $J$  = 8.8 Hz, 2H).

<sup>13</sup>C NMR (75 MHz, CDCl<sub>3</sub>)  $\delta$  = 0.9, 123.9, 130.0, 137.9, 150.5, 191.2.

### **2-Iodo-1-phenylpropanone<sup>1</sup> (Table 2, entry 7)**

$^1\text{H}$  NMR (300 MHz,  $\text{CDCl}_3$ ):  $\delta$  = 2.07 (d,  $J$  = 6.1 Hz, 3H), 5.44 (q,  $J$  = 6.1 Hz, 1H), 7.41-7.59 (m, 3H), 7.98 (d,  $J$  = 7.2 Hz, 2H).

$^{13}\text{C}$  NMR (75 MHz,  $\text{CDCl}_3$ ):  $\delta$  = 18.1, 21.9, 128.6, 128.7, 130.1, 133.4, 194.7.

MS (EI):  $m/z$  (%) = 260 ( $\text{M}^+$ ) (10), 105 (100), 91 (32), 77 (92), 51 (54).

### **2-Iodocycloheptanone<sup>2</sup> (Table 2, entry 8)**

$^1\text{H}$  NMR (300 MHz,  $\text{CDCl}_3$ ):  $\delta$  = 1.16-2.49 (m, 9H), 2.88-2.98 (m, 1H), 4.51 (dd,  $J$  = 5.28, 10.57 Hz, 1H).

$^{13}\text{C}$  NMR (75 MHz,  $\text{CDCl}_3$ ):  $\delta$  = 25.4, 28.8, 30.0, 31.9, 35.6, 38.1, 207.7.

### **2,7-Diiodocyclooctanone (Table 2, entry 9)**

$^1\text{H}$  NMR (300 MHz,  $\text{CDCl}_3$ ):  $\delta$  = 1.32-1.69 (m, 6H), 2.34-2.43 (m, 4H), 4.76-4.83 (m, 2H).

$^{13}\text{C}$  NMR (75 MHz,  $\text{CDCl}_3$ ):  $\delta$  = 22.4, 23.6, 23.8, 28.1, 37.5, 205.4.

### **1-Iodo-2-nonanone (Table 2, entry 10)**

$^1\text{H}$  NMR (300 MHz,  $\text{CDCl}_3$ ):  $\delta$  = 0.89 (t,  $J$  = 6.8 Hz, 3H), 1.23-1.35 (m, 8H), 1.55-1.67 (m, 2H), 2.69 (t,  $J$  = 7.5 Hz, 2H), 3.73 (s, 2H).

$^{13}\text{C}$  NMR (75 MHz,  $\text{CDCl}_3$ ):  $\delta$  = 6.2, 14.0, 22.5, 24.1, 28.9, 31.6, 39.3, 203.2.

### **3-Iodo-2-nonanone (Table 2, entry 10)**

$^1\text{H}$  NMR (300 MHz,  $\text{CDCl}_3$ ):  $\delta$  = 0.82-0.97 (m, 3H), 1.19-1.39 (m, 8H), 1.83-1.97 (m, 2H), 2.39 (s, 3H), 4.39 (t,  $J$  = 7.5 Hz, 1H).

### **1,3-Diiodo-2-nonanone (Table 2, entry 10)**

$^1\text{H}$  NMR (300 MHz,  $\text{CDCl}_3$ ):  $\delta$  = 0.89 (t,  $J$  = 6.7 Hz, 3H), 1.24-1.37 (m, 8H), 1.92-2.07 (m, 2H), 3.85 (d,  $J$  = 9.8 Hz, 1H), 4.36 (d,  $J$  = 9.8 Hz, 1H), 4.95 (t,  $J$  = 7.5 Hz, 1H).

$^{13}\text{C}$  NMR (75 MHz,  $\text{CDCl}_3$ ):  $\delta$  = 2.6, 13.9, 22.4, 28.4, 29.0, 31.4, 34.3, 196.3.

### **1,3-Diiodo-2-octanone (Table 2, entry 11)**

$^1\text{H}$  NMR (300 MHz,  $\text{CDCl}_3$ ):  $\delta$  = 0.84-0.93 (m, 3H), 1.27-1.38 (m, 6H), 1.92-2.07 (m, 2H), 3.85 (d,  $J$  = 9.8 Hz, 1H), 4.36 (d,  $J$  = 9.8 Hz, 1H), 4.95 (t,  $J$  = 7.5 Hz, 1H).

$^{13}\text{C}$  NMR (75 MHz,  $\text{CDCl}_3$ ):  $\delta$  = 2.5, 13.9, 22.3, 28.4, 28.8, 30.9, 34.3, 196.4.

**2-Iodo-3-octanone (Table 2, entry 12)**

$^1\text{H}$  NMR (300 MHz,  $\text{CDCl}_3$ ):  $\delta$  = 0.89 (t,  $J$  = 6.8 Hz, 3H), 1.23-1.35 (m, 4H), 1.58-1.71 (m, 2H), 1.89 (d,  $J$  = 7.5 Hz, 3H), 2.54-2.67 (m, 1H), 2.80-2.94 (m, 1H), 4.62 (q,  $J$  = 6.8 Hz, 1H).

$^{13}\text{C}$  NMR (75 MHz,  $\text{CDCl}_3$ ):  $\delta$  = 13.9, 21.6, 22.4, 24.1, 24.7, 31.2, 38.4, 205.3.

**4-Iodo-3-octanone (Table 2, entry 12)**

$^1\text{H}$  NMR (300 MHz,  $\text{CDCl}_3$ ):  $\delta$  = 0.91 (t,  $J$  = 6.9 Hz, 3H), 1.14 (t,  $J$  = 7.3 Hz, 3H), 1.23-1.45 (m, 4H), 1.86-1.99 (m, 2H), 2.55-2.70 (m, 1H), 2.79-2.95 (m, 1H), 4.46 (t,  $J$  = 7.5 Hz, 1H).

**2,4-Diiodo-3-octanone (Table 2, entry 12)**

$^1\text{H}$  NMR (300 MHz,  $\text{CDCl}_3$ ):  $\delta$  = 0.93 (t,  $J$  = 7.2 Hz, 3H), 1.35-1.45 (m, 4H), 1.98 (d,  $J$  = 6.7 Hz, 3H), 2.01-2.13 (m, 2H), 5.02 (t,  $J$  = 7.4 Hz, 1H), 5.17 (q,  $J$  = 6.7 Hz, 1H).

$^{13}\text{C}$  NMR (75 MHz,  $\text{CDCl}_3$ ):  $\delta$  = 13.8, 21.8, 21.9, 22.2, 28.9, 31.0, 33.8, 197.1.

**1-Iodo-4-phenyl-2-butanone<sup>3</sup> (Table 2, entry 13)**

$^1\text{H}$  NMR (300 MHz,  $\text{CDCl}_3$ ):  $\delta$  = 2.87-3.05 (m, 4H), 3.69 (s, 2H), 7.11-7.29 (m, 5H).

**3-Iodo-4-phenyl-2-butanone (Table 2, entry 13)**

$^1\text{H}$  NMR (300 MHz,  $\text{CDCl}_3$ ):  $\delta$  = 2.33 (s, 3H), 3.09-3.21 (m, 1H), 3.41-3.52 (m, 1H), 4.64 (m, 1H), 7.11-7.33 (m, 5H).

# Copies of $^1\text{H}$ and $^{13}\text{C}$ NMR Spectra

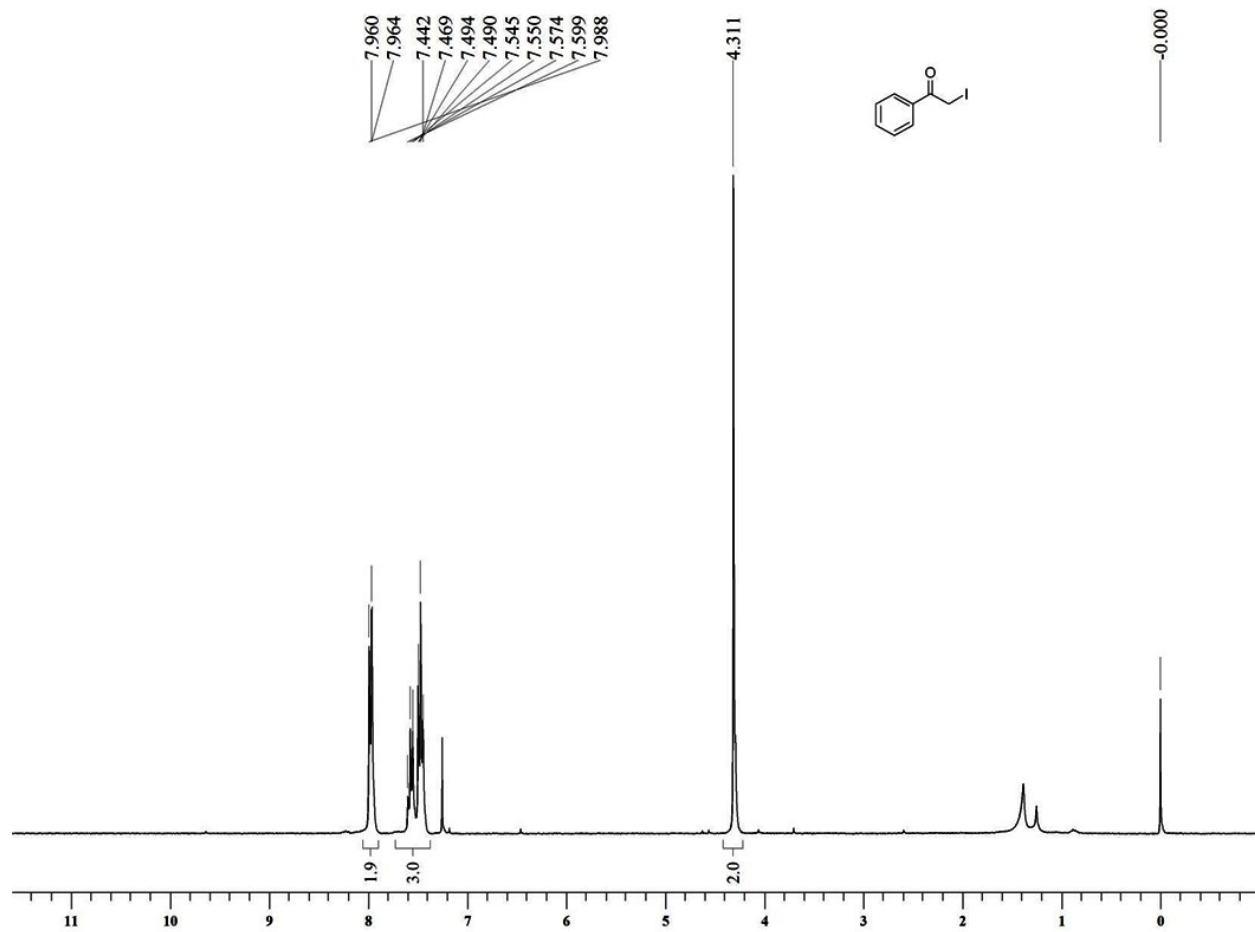

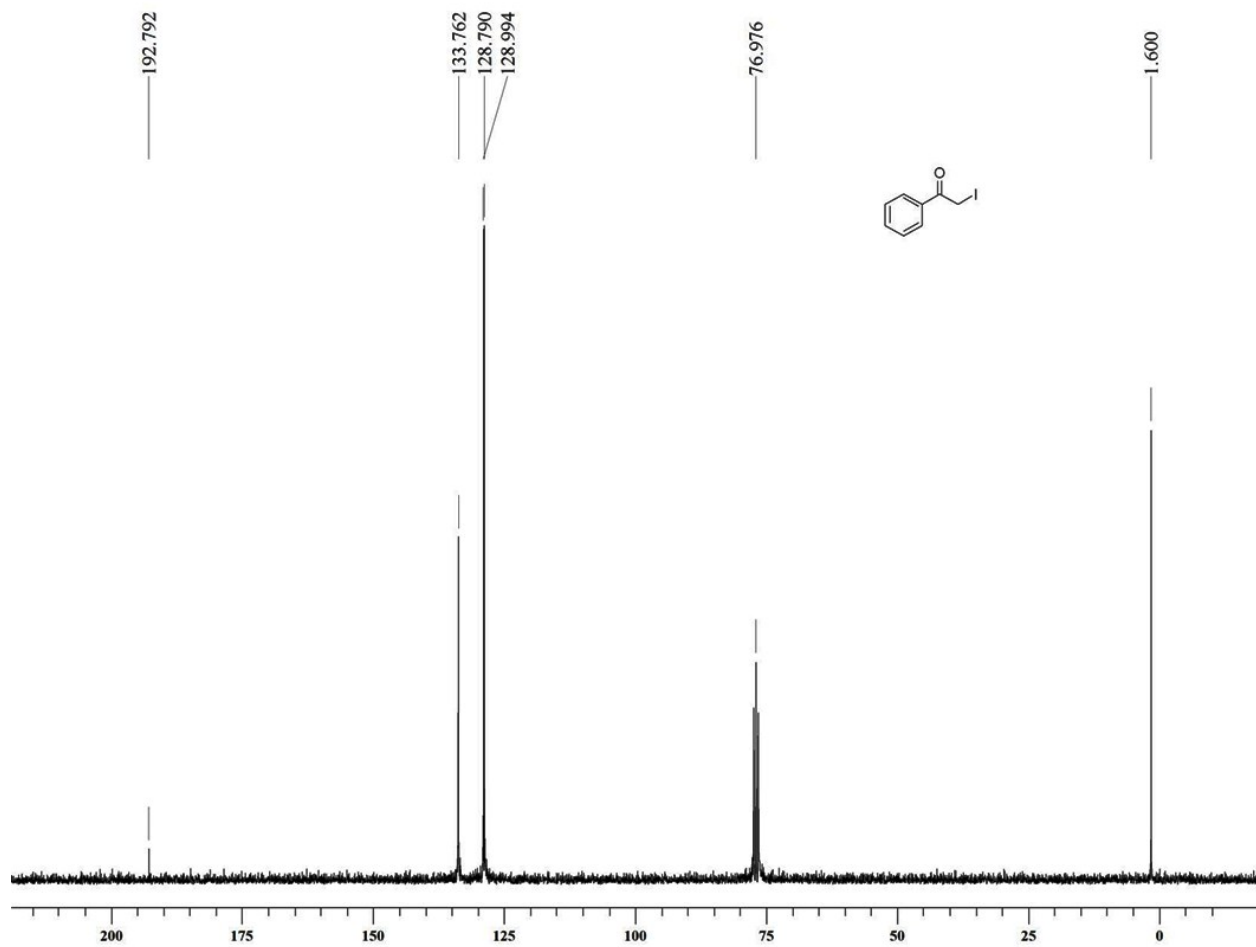

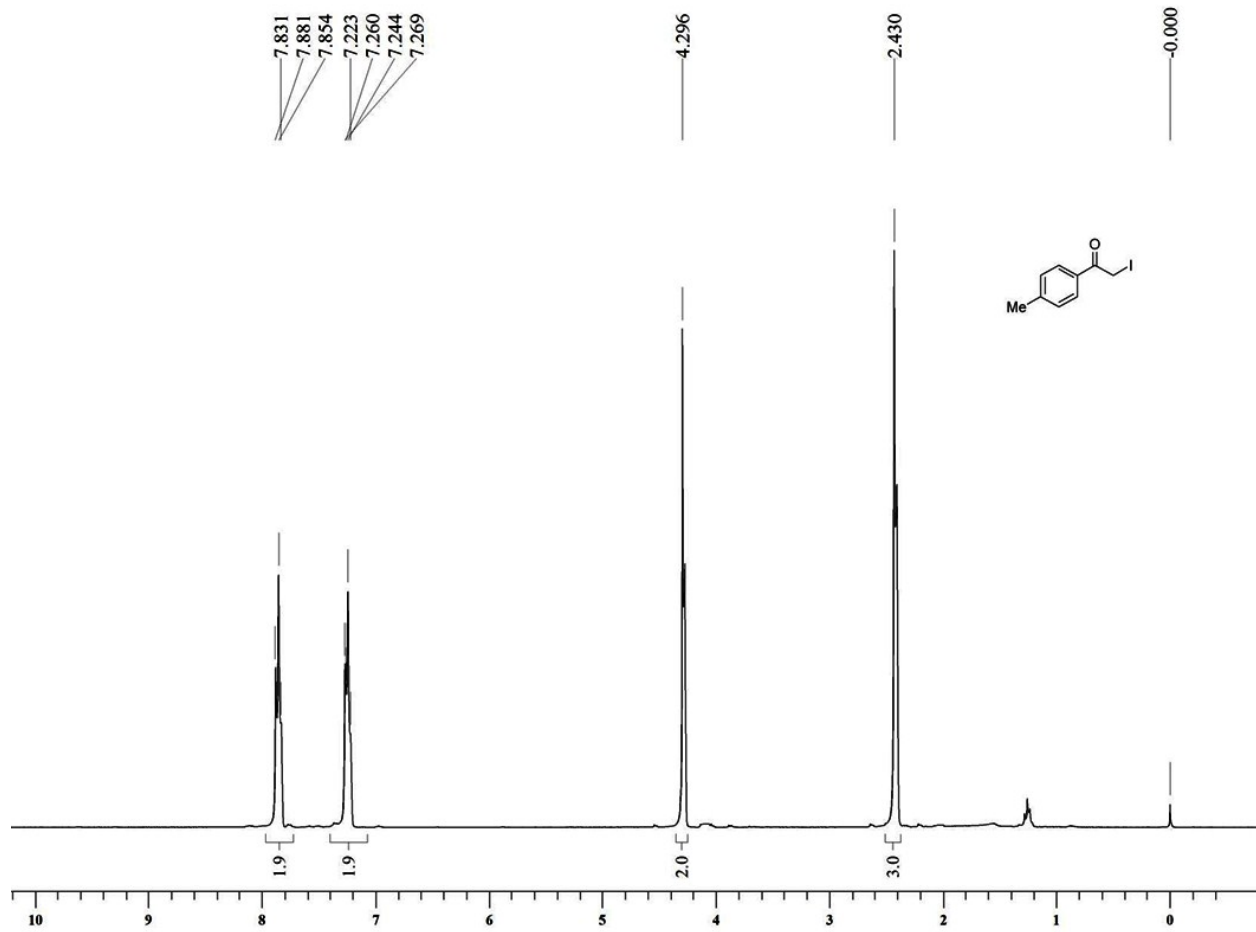



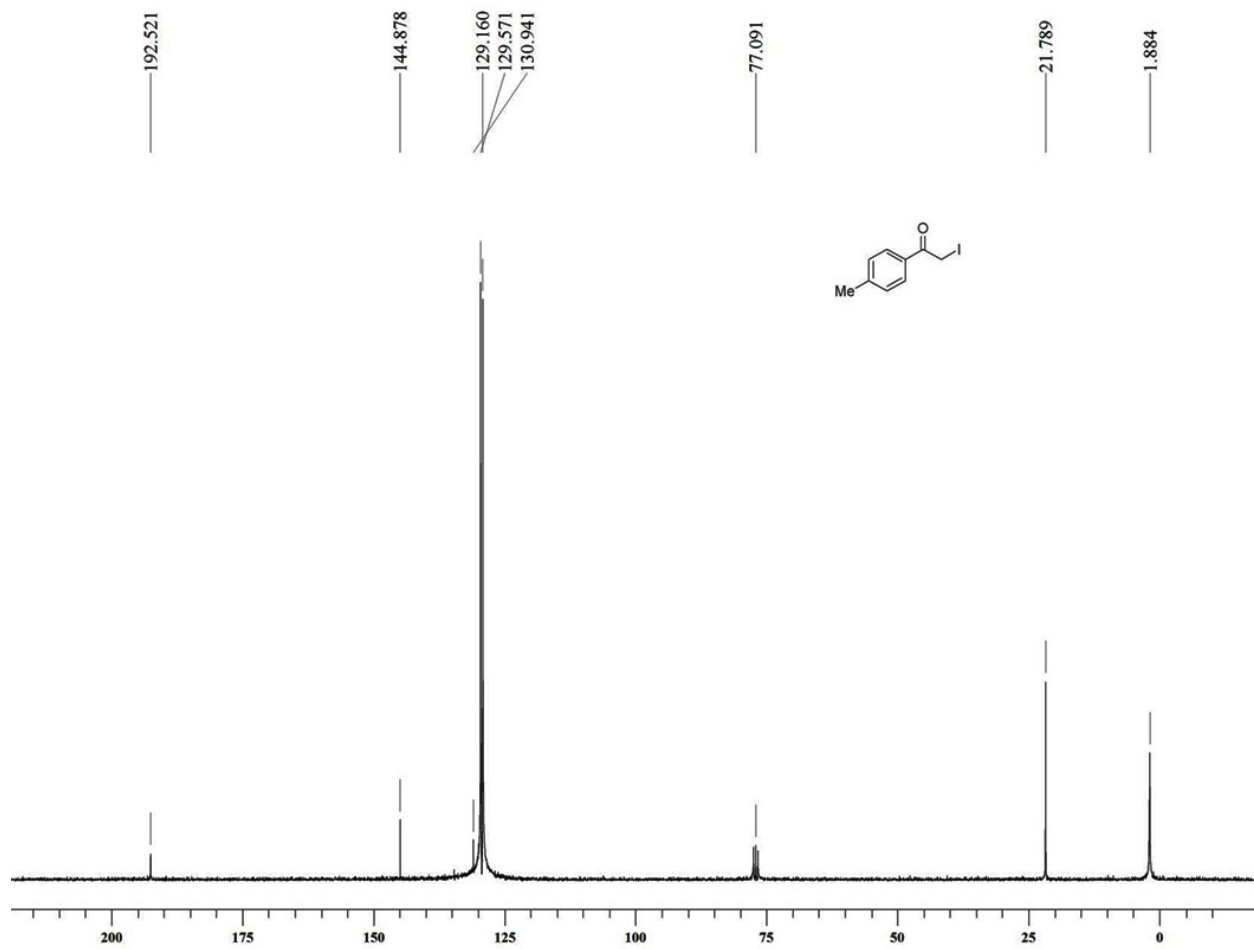

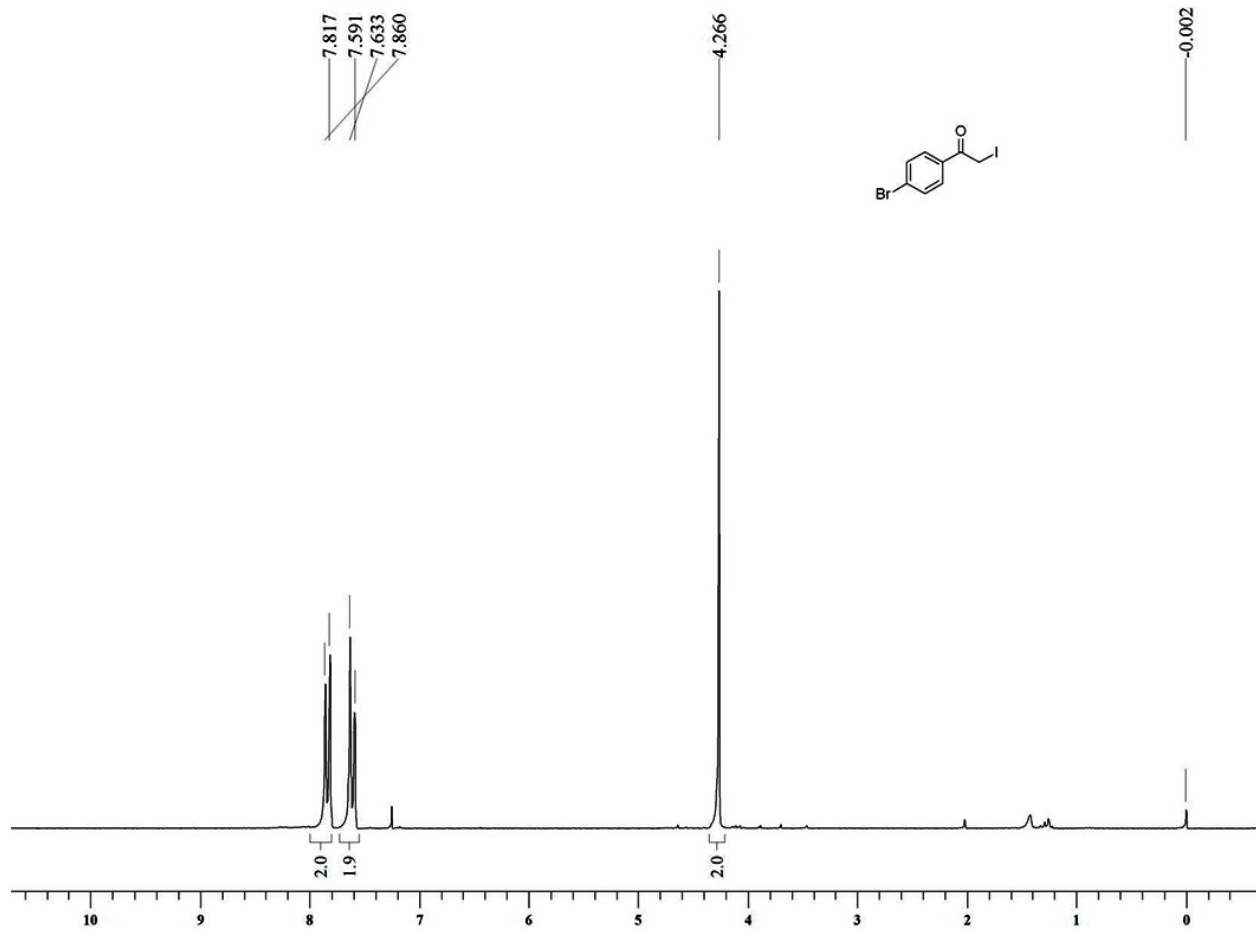

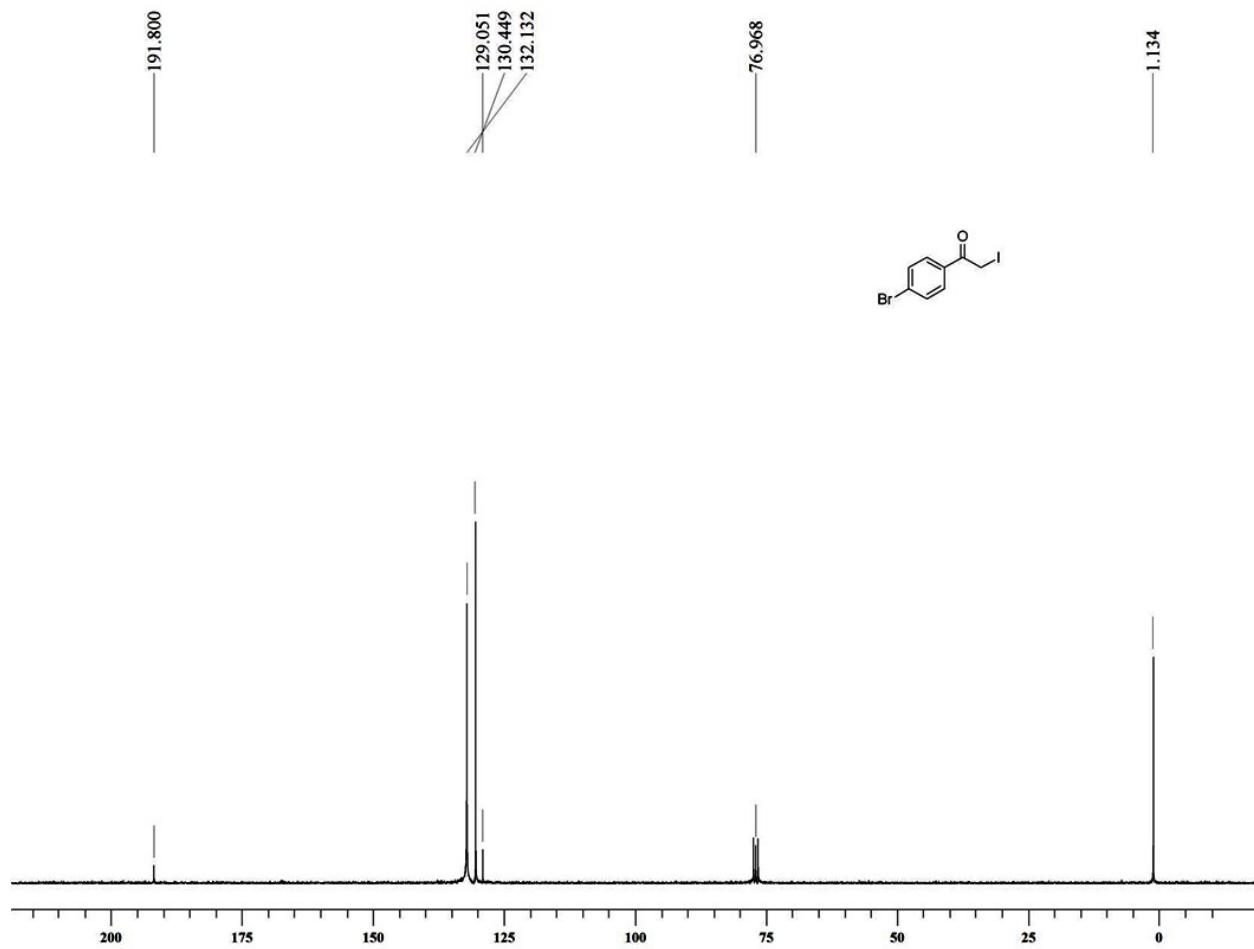

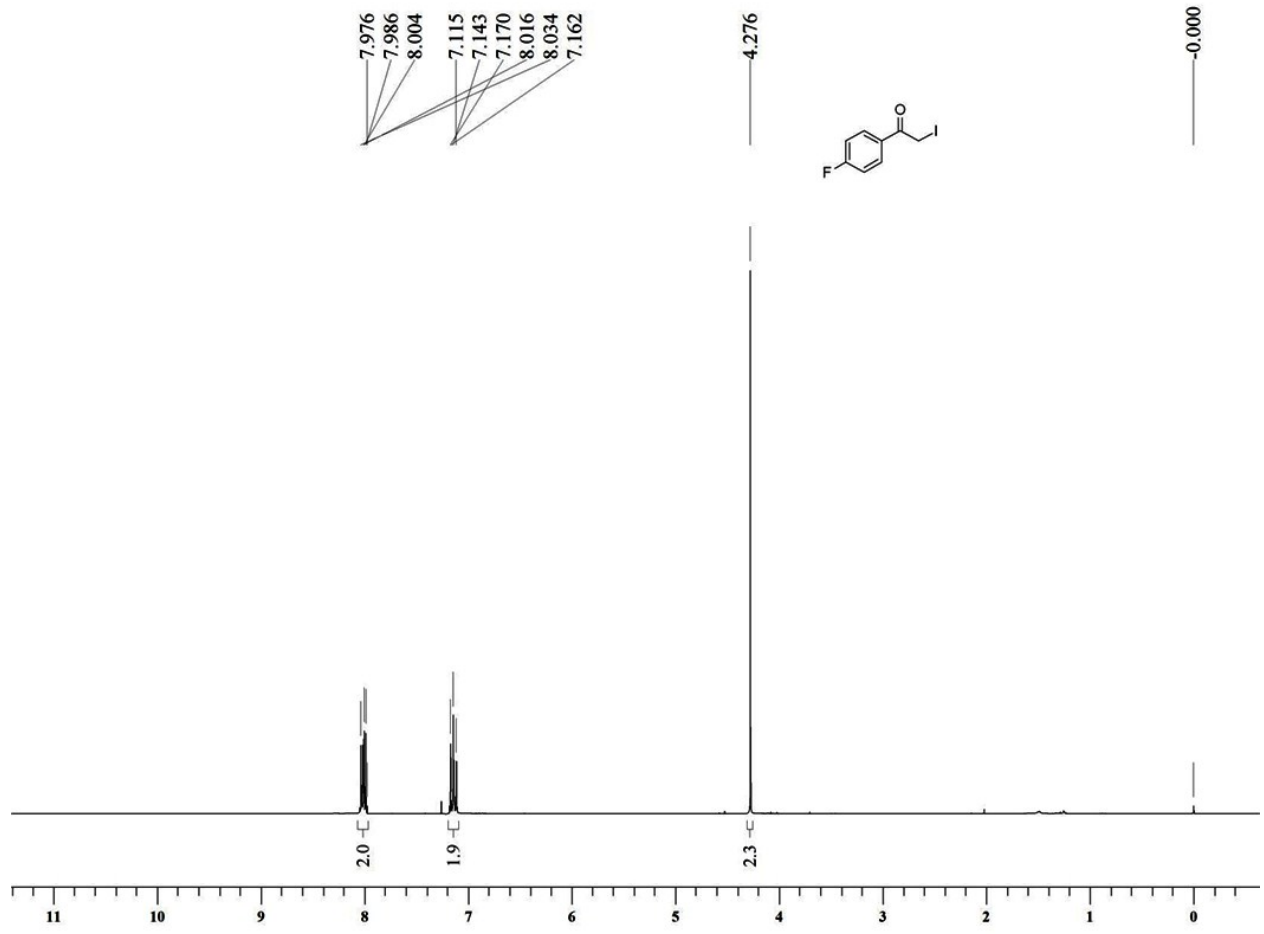

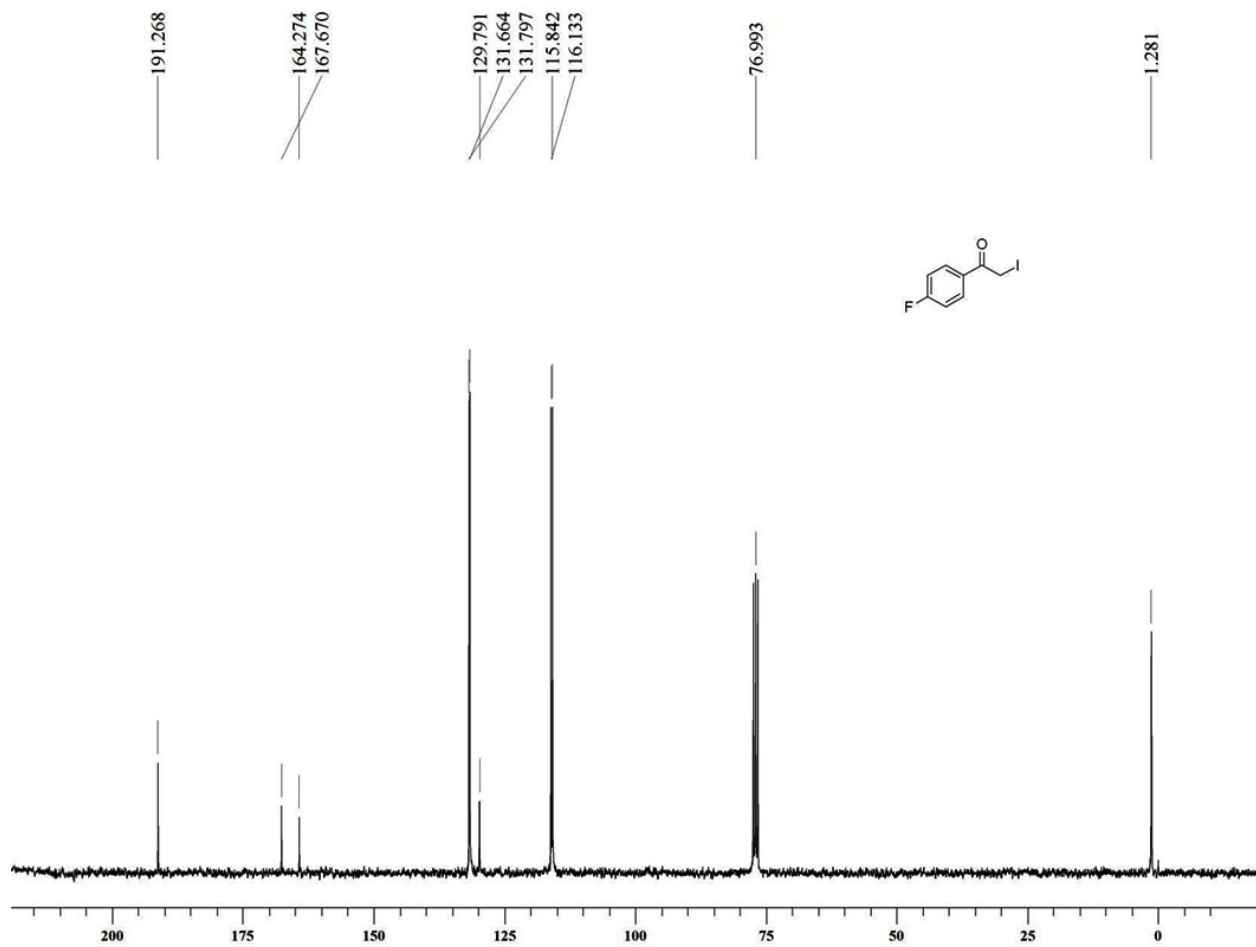

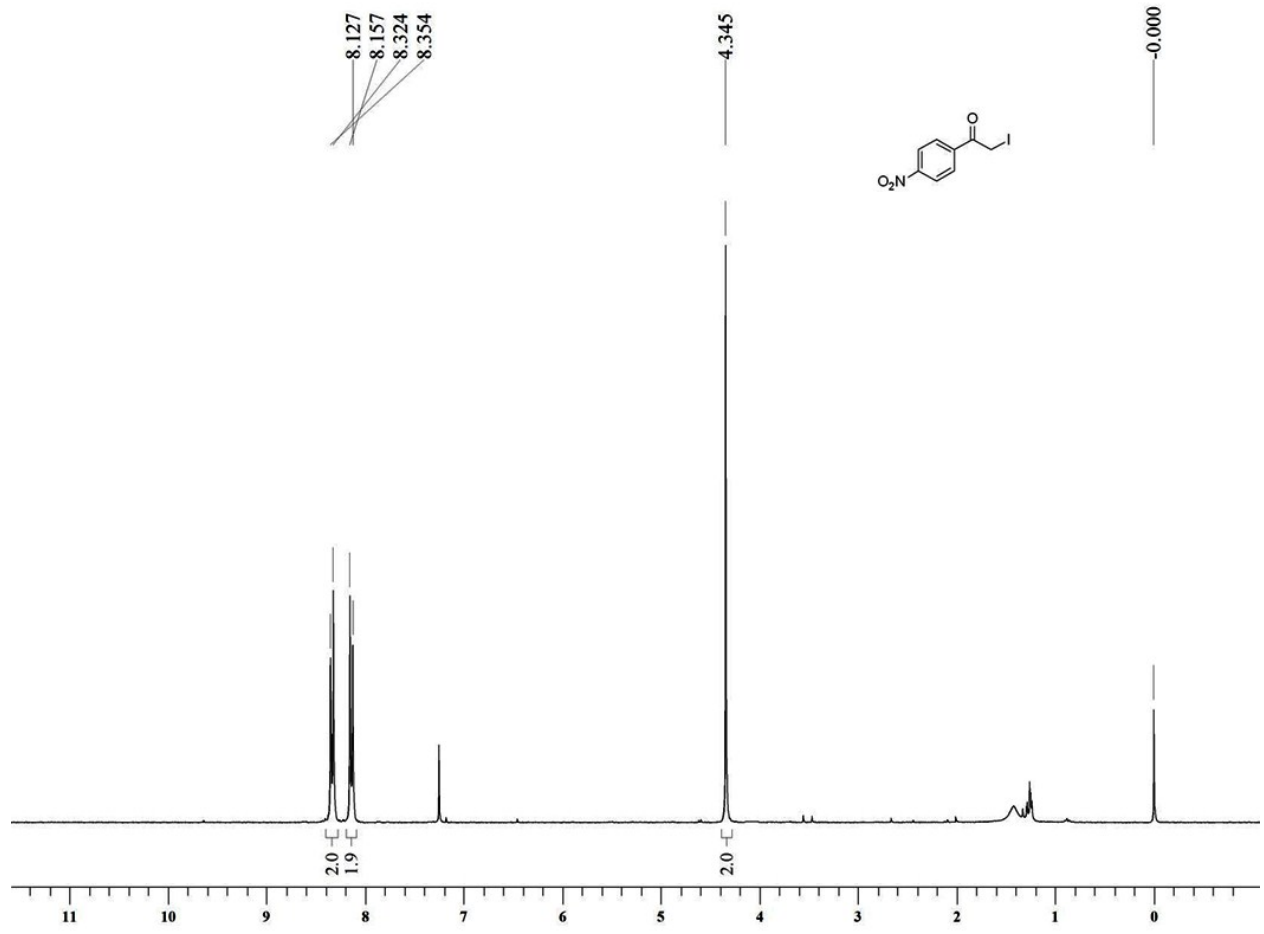

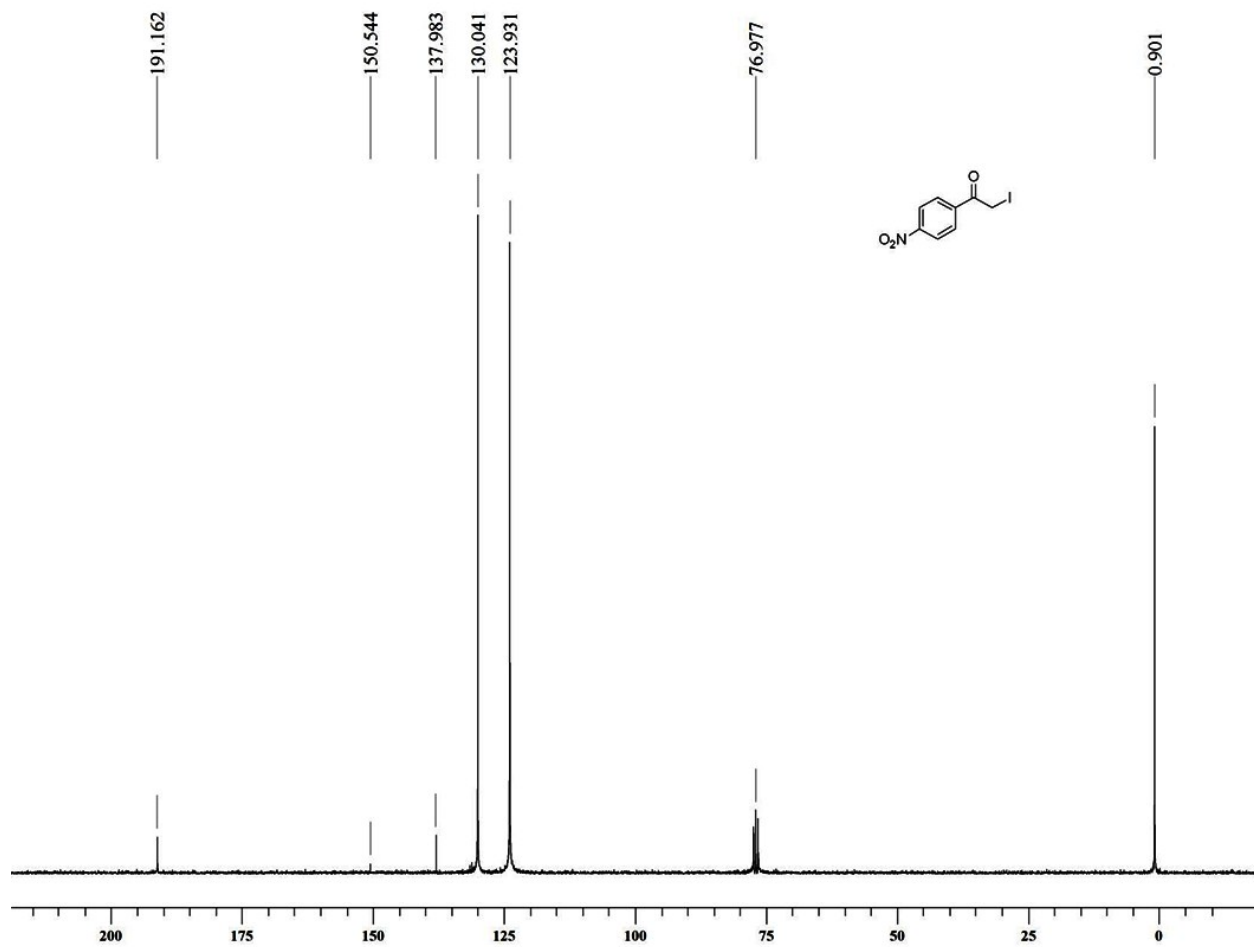

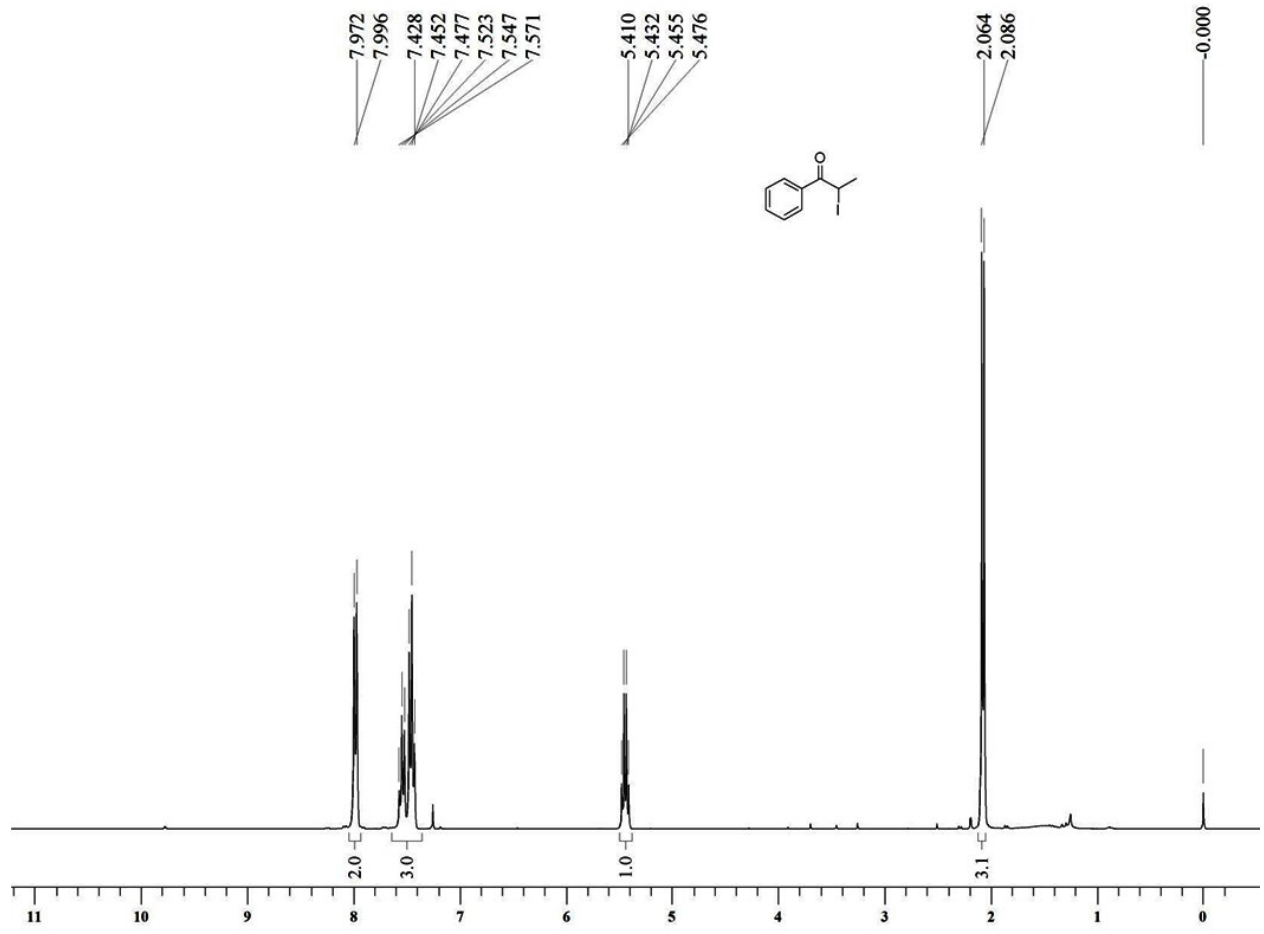



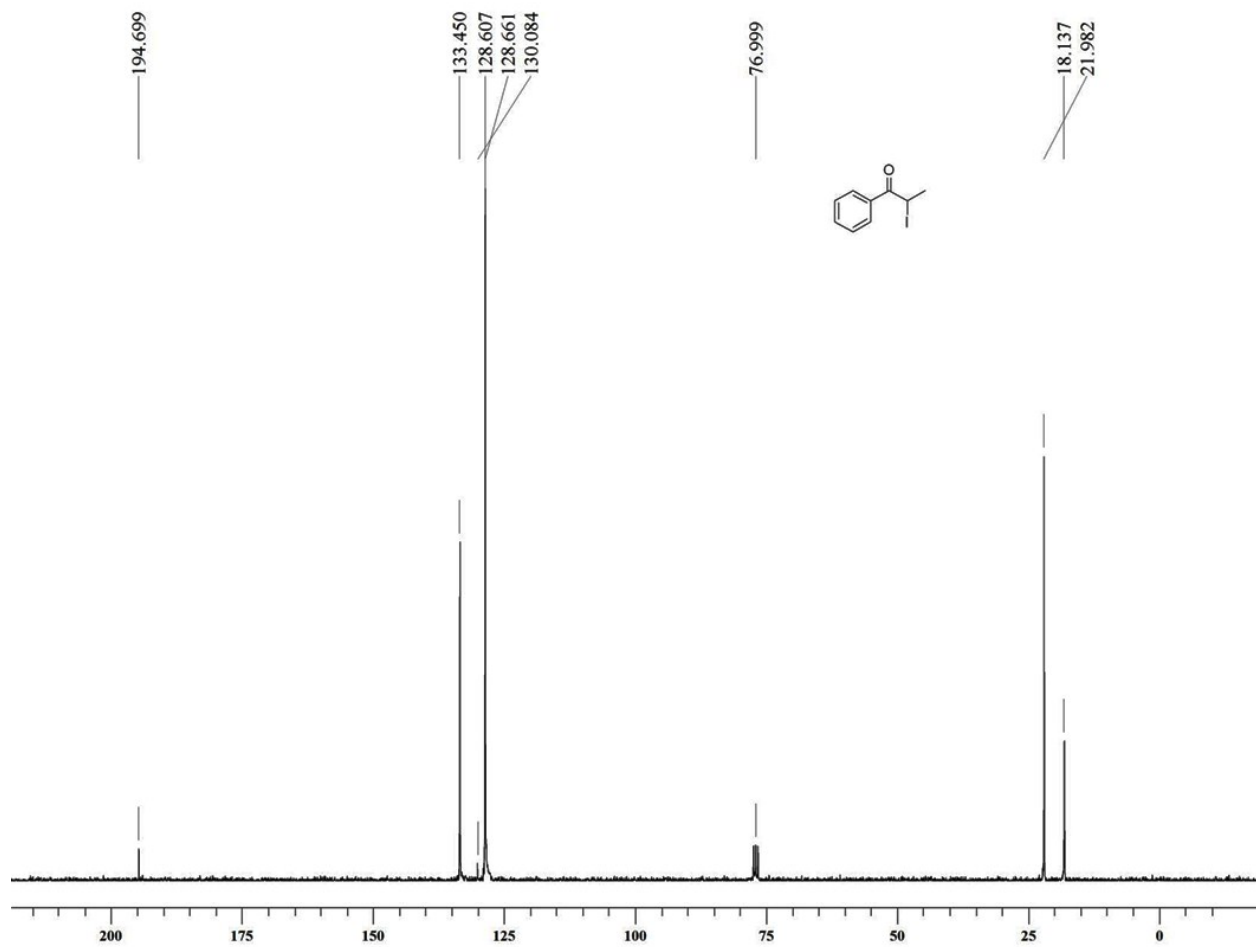

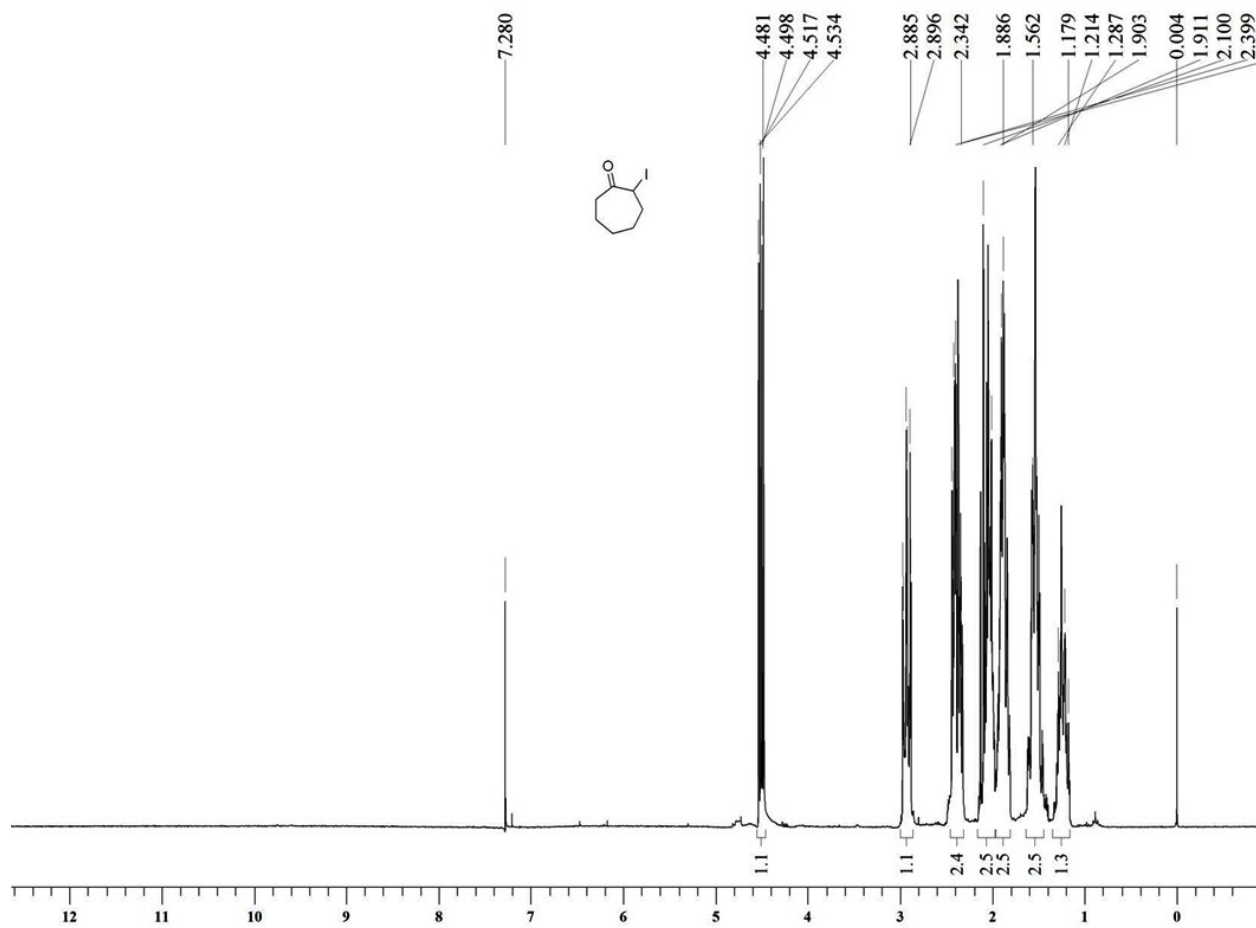

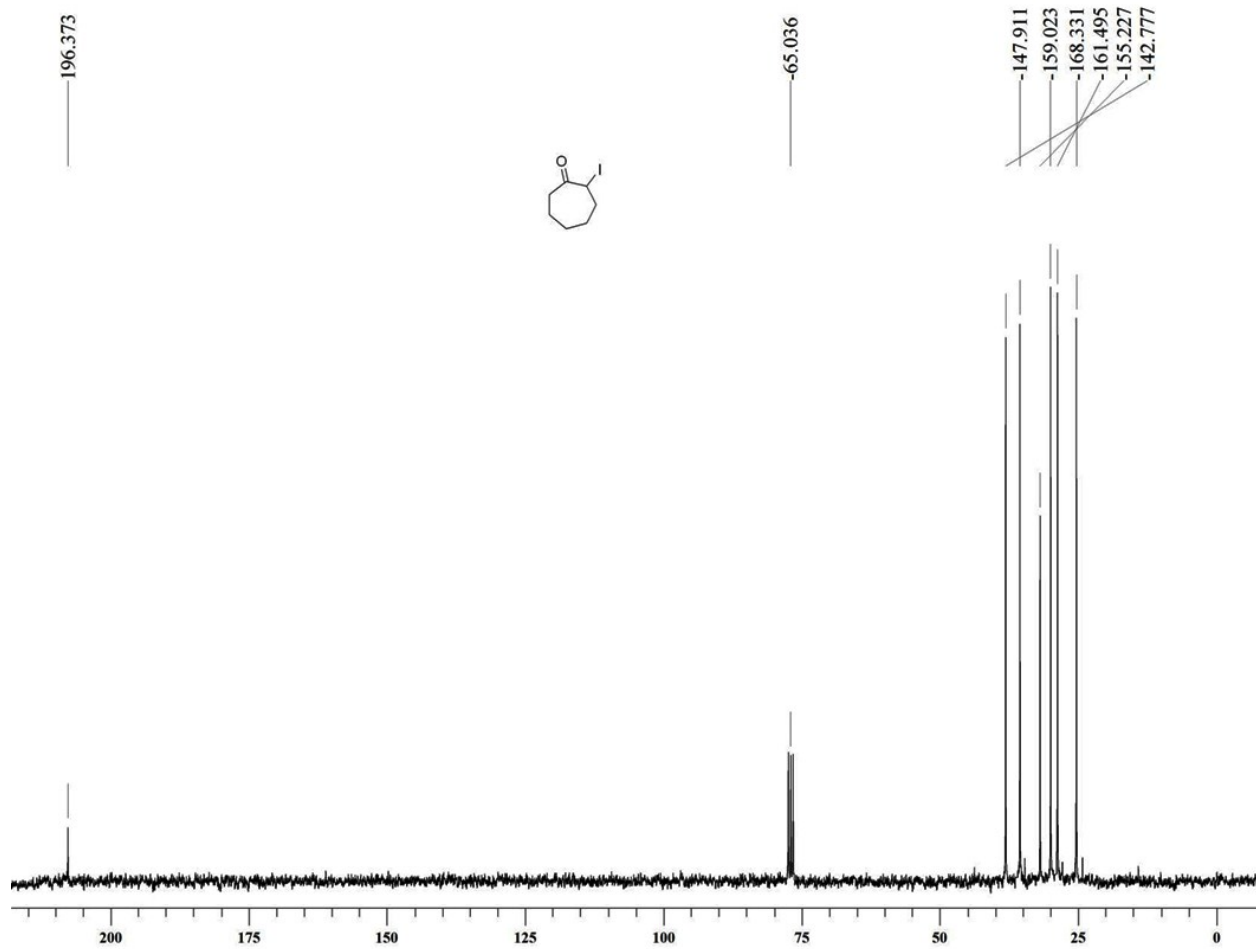

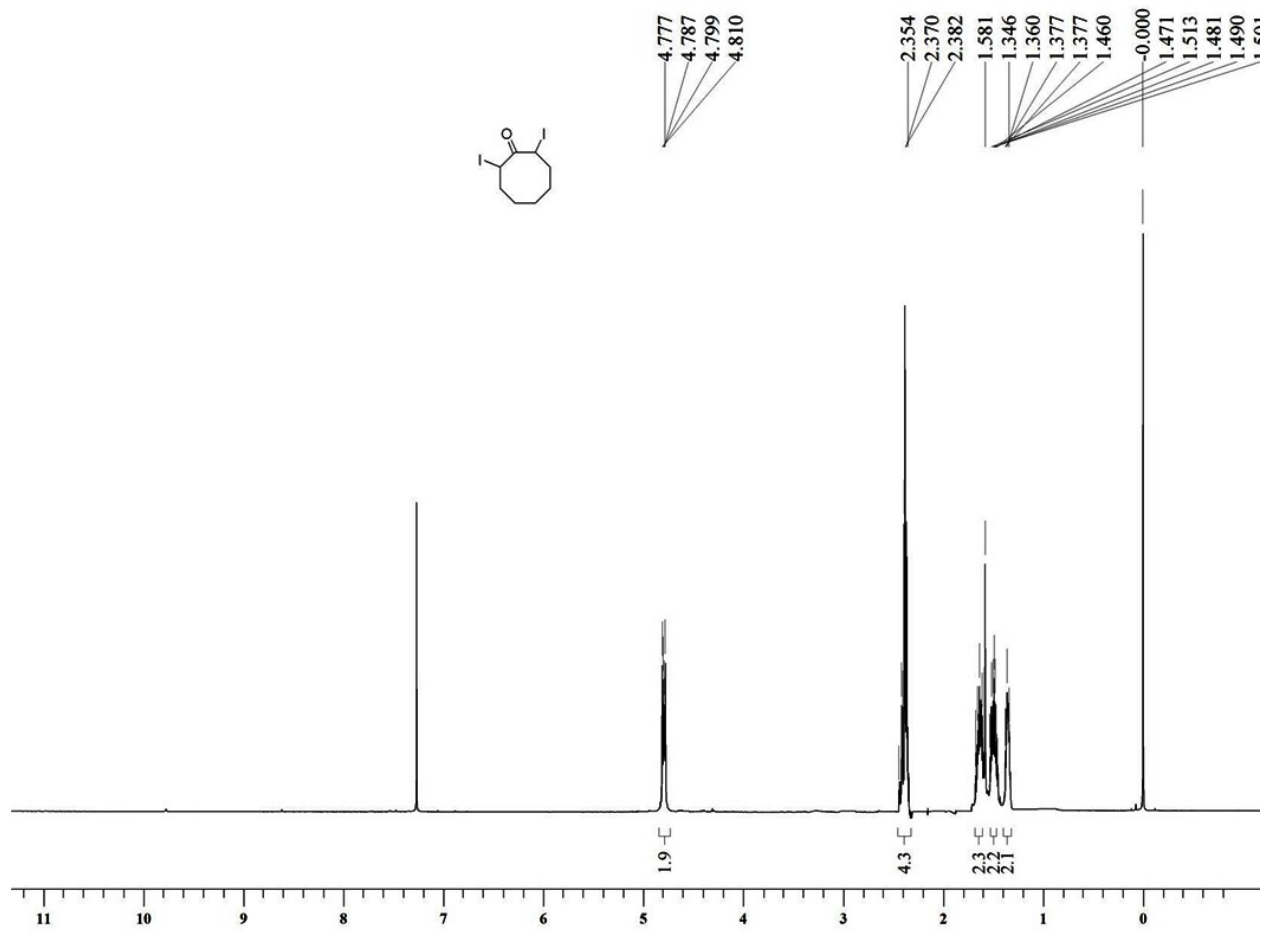

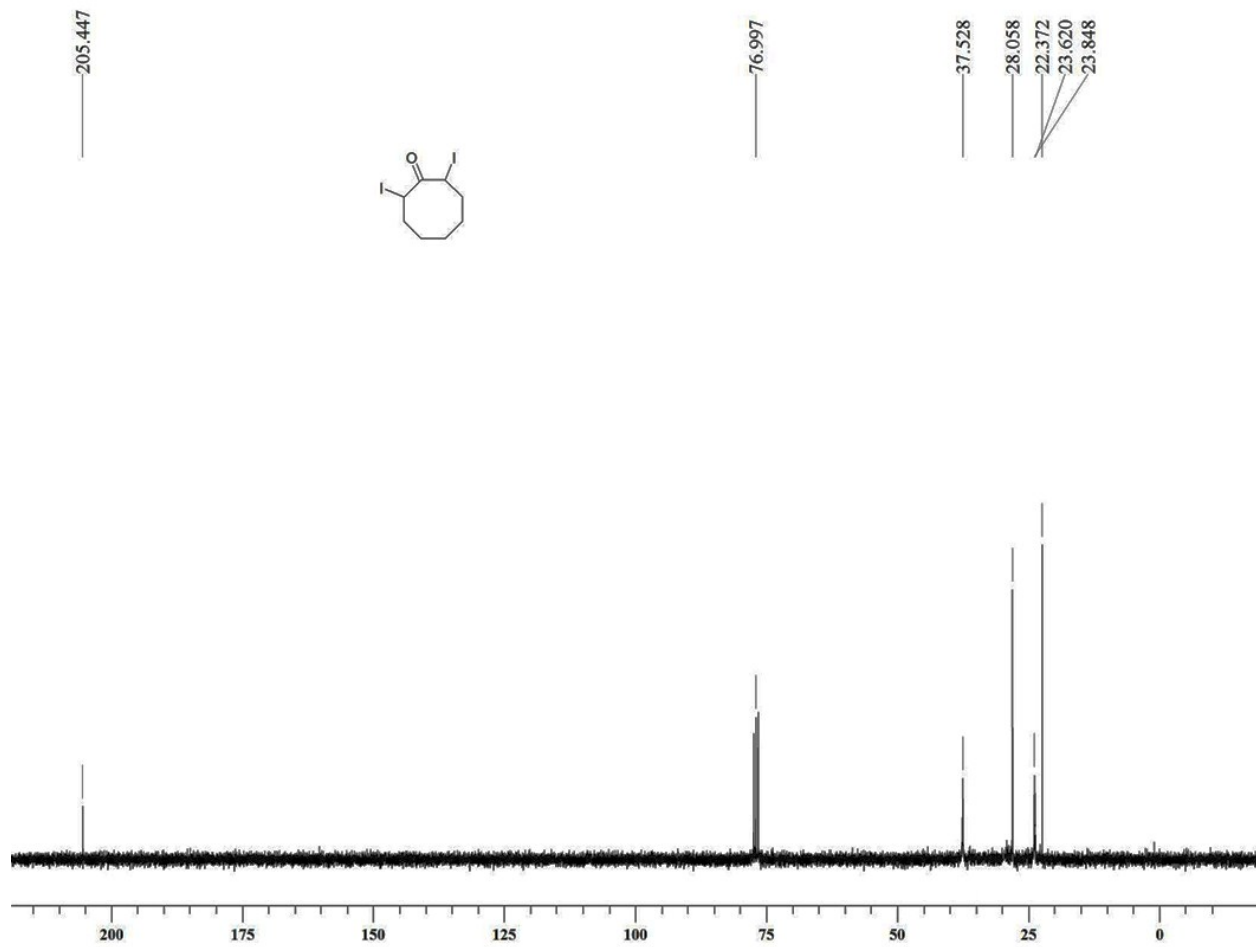

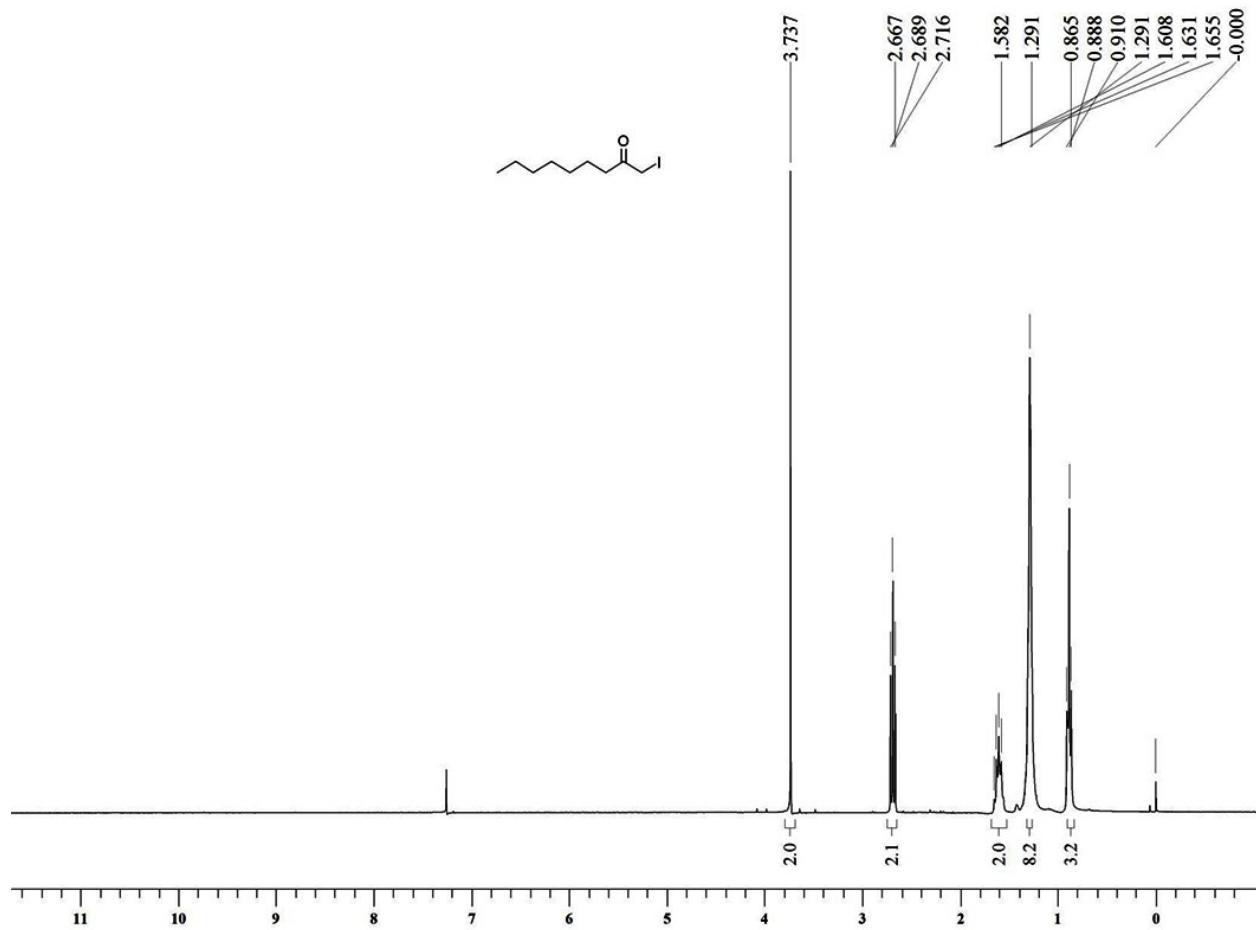

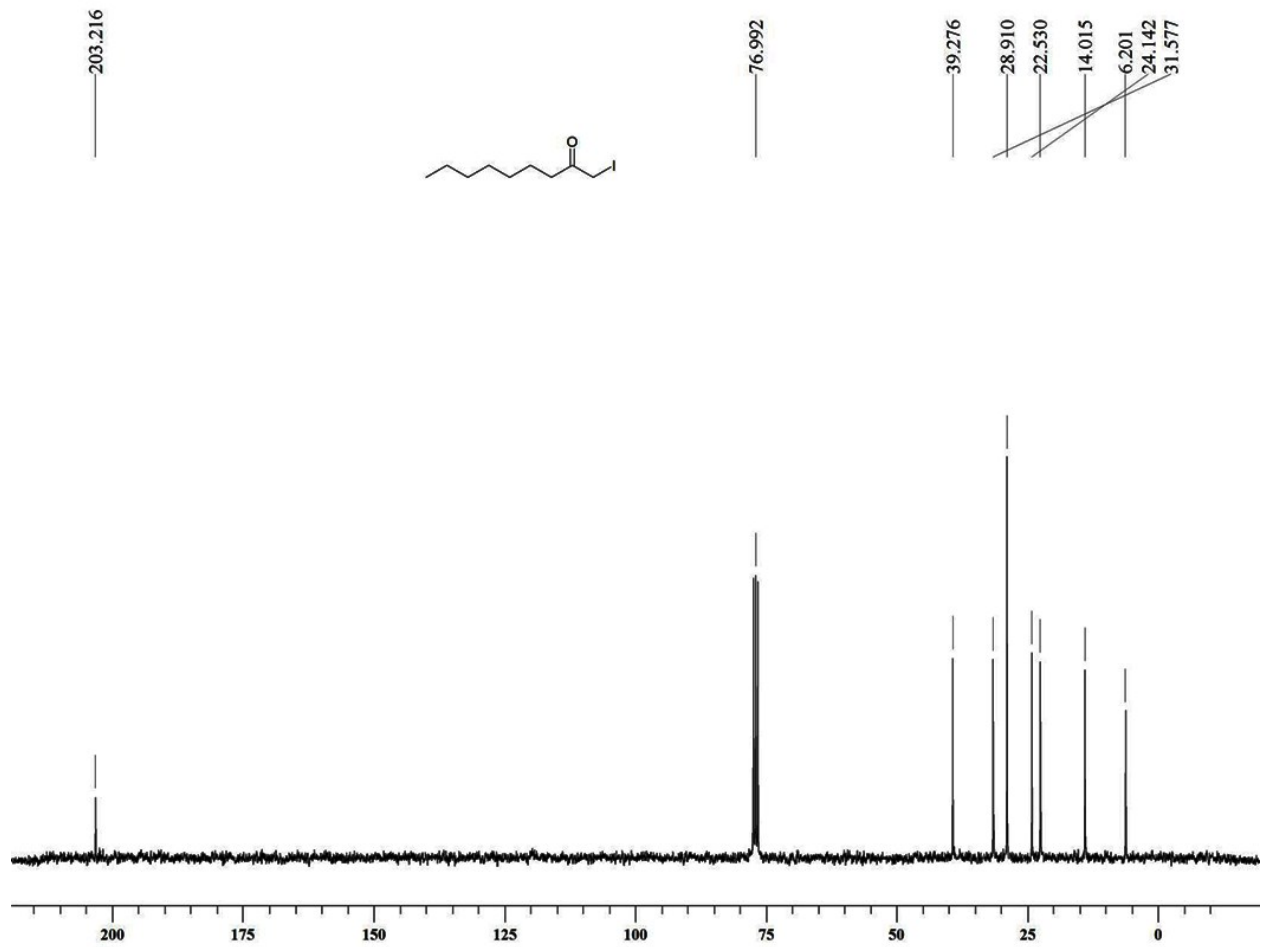

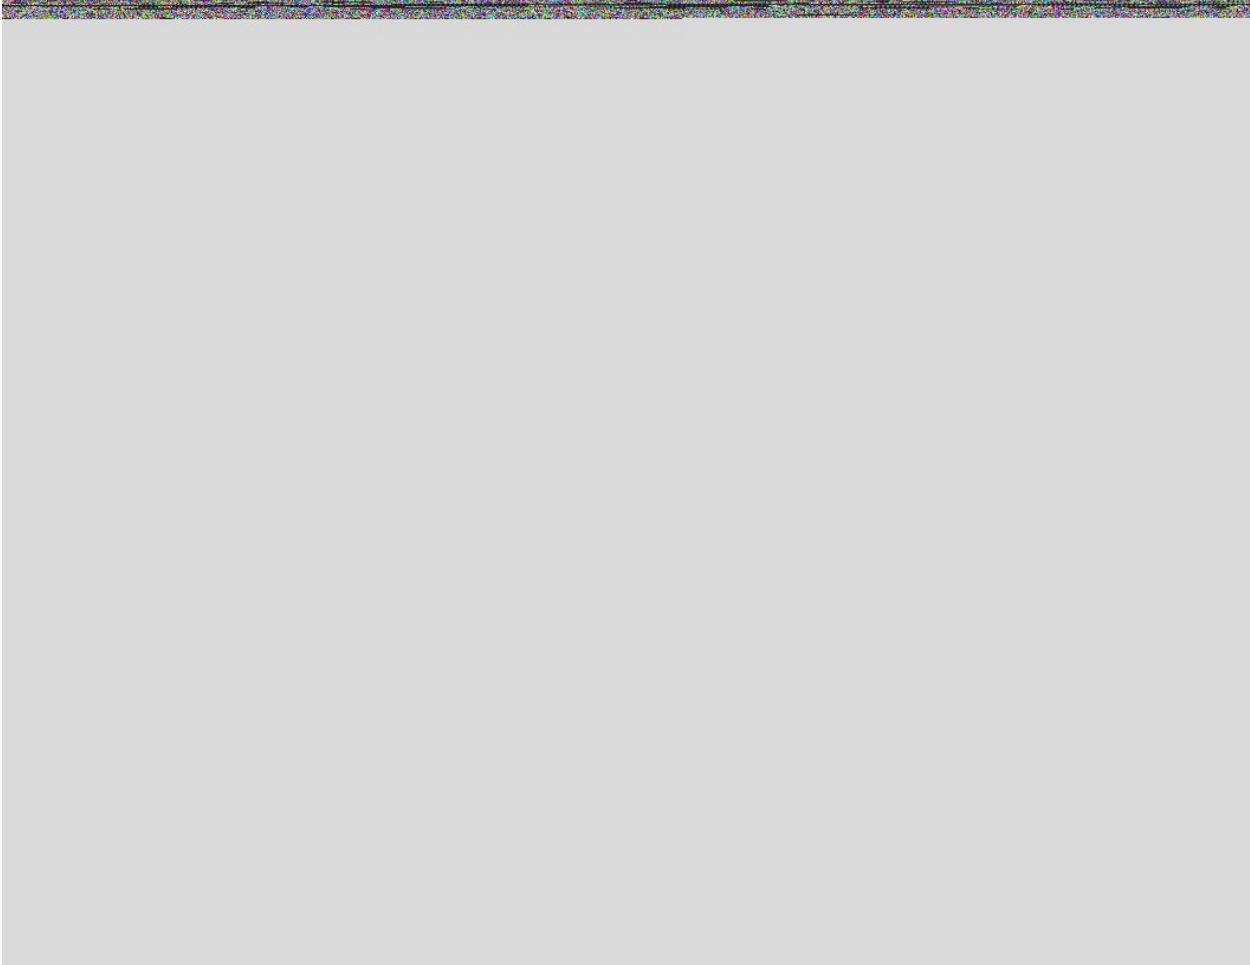



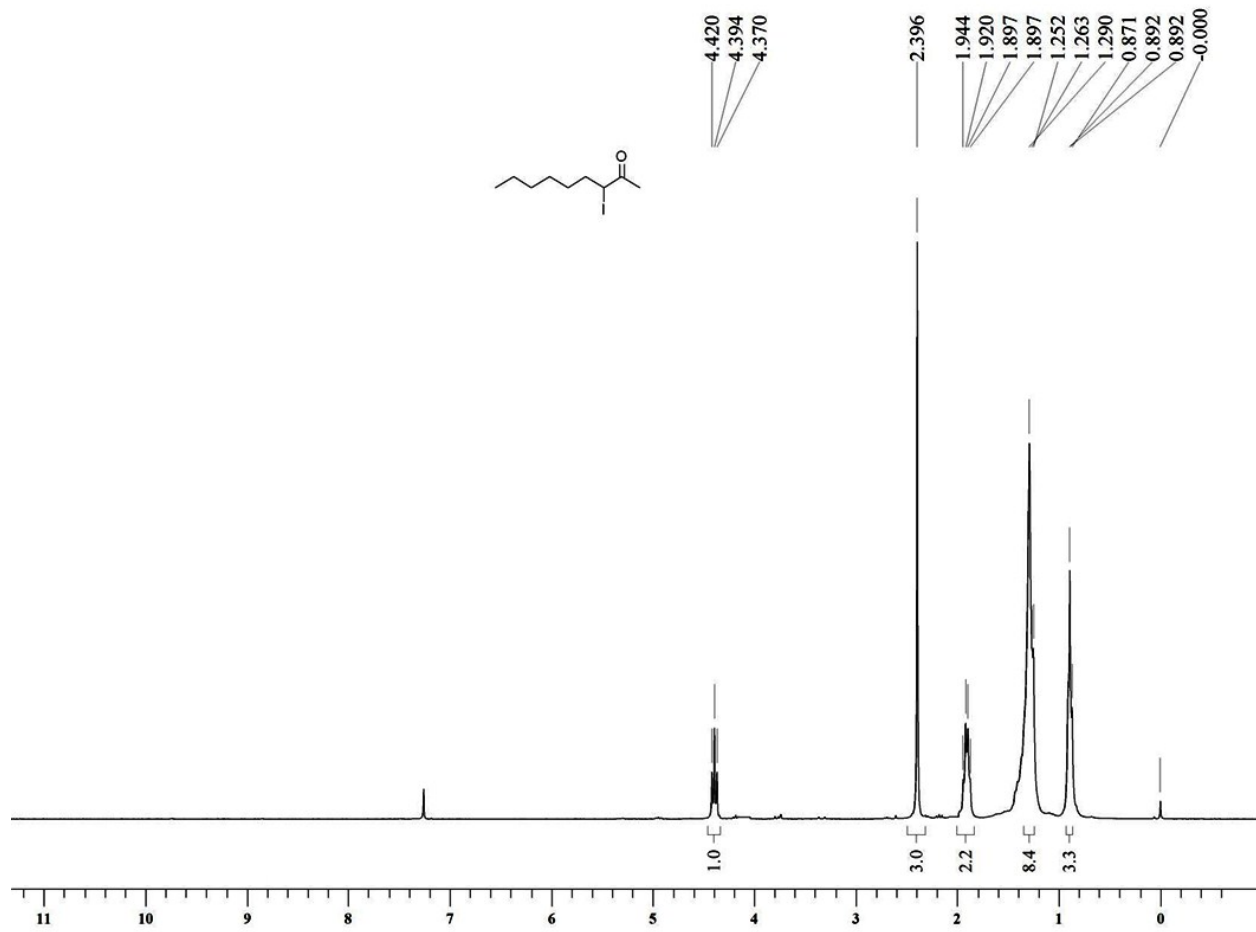

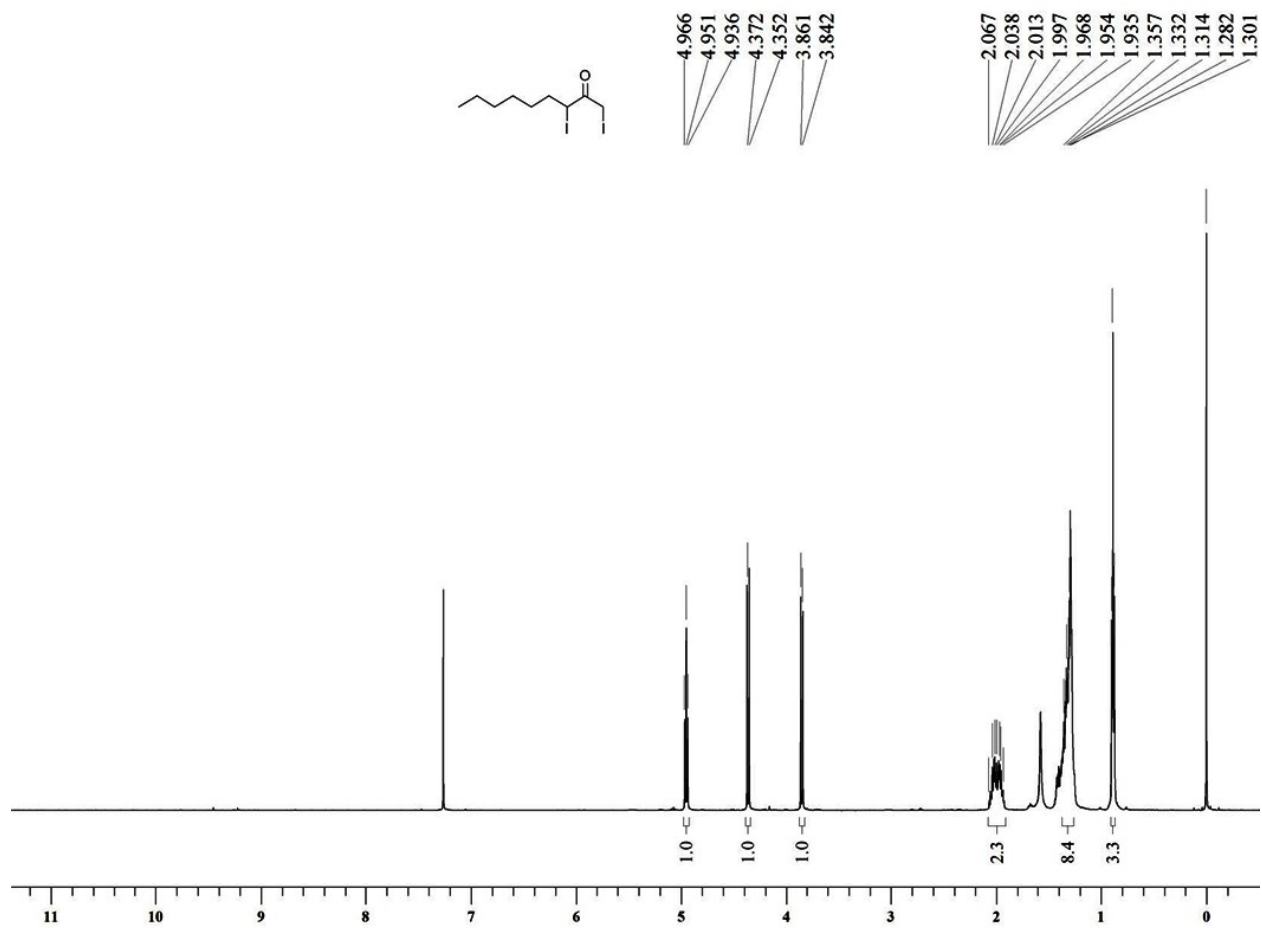

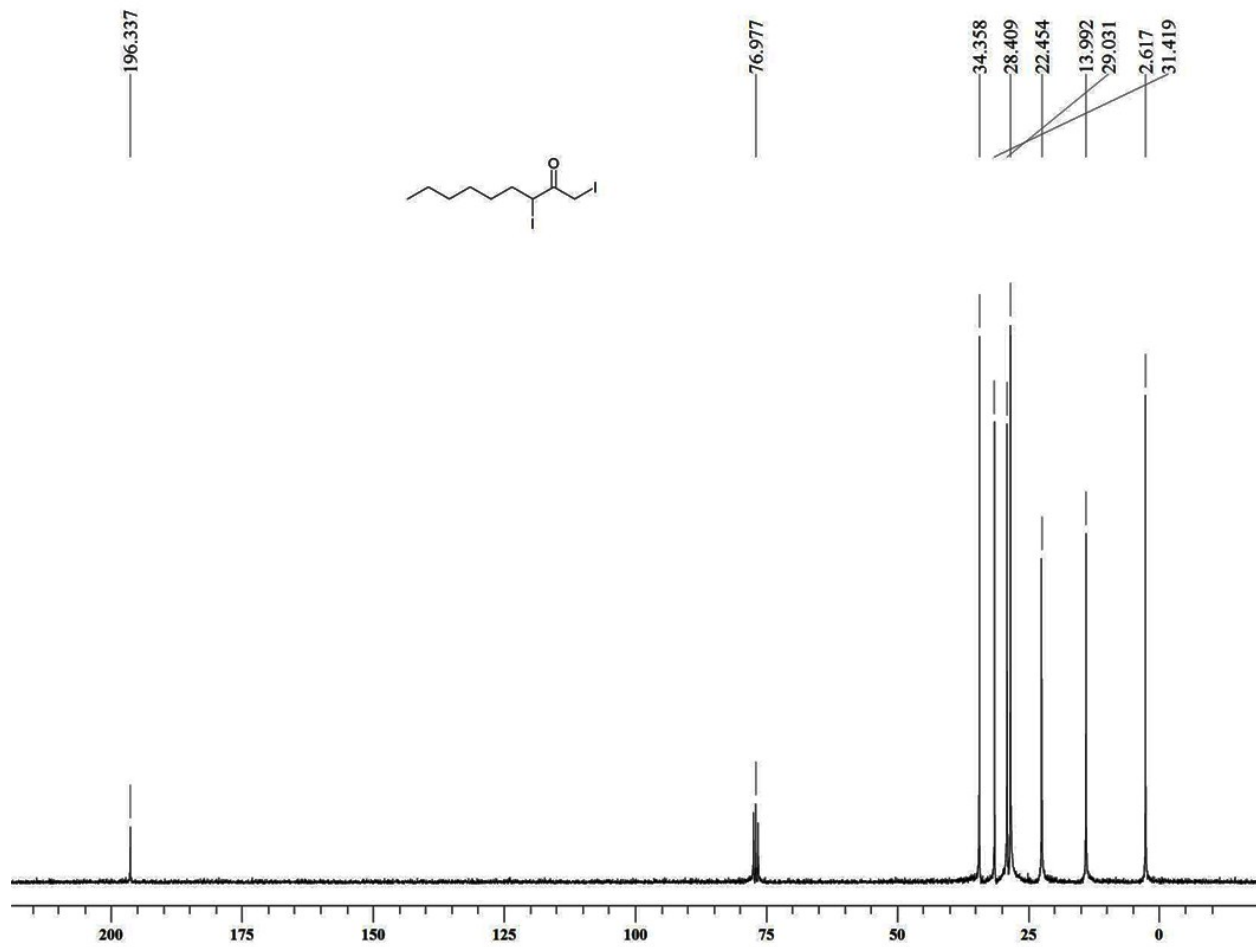

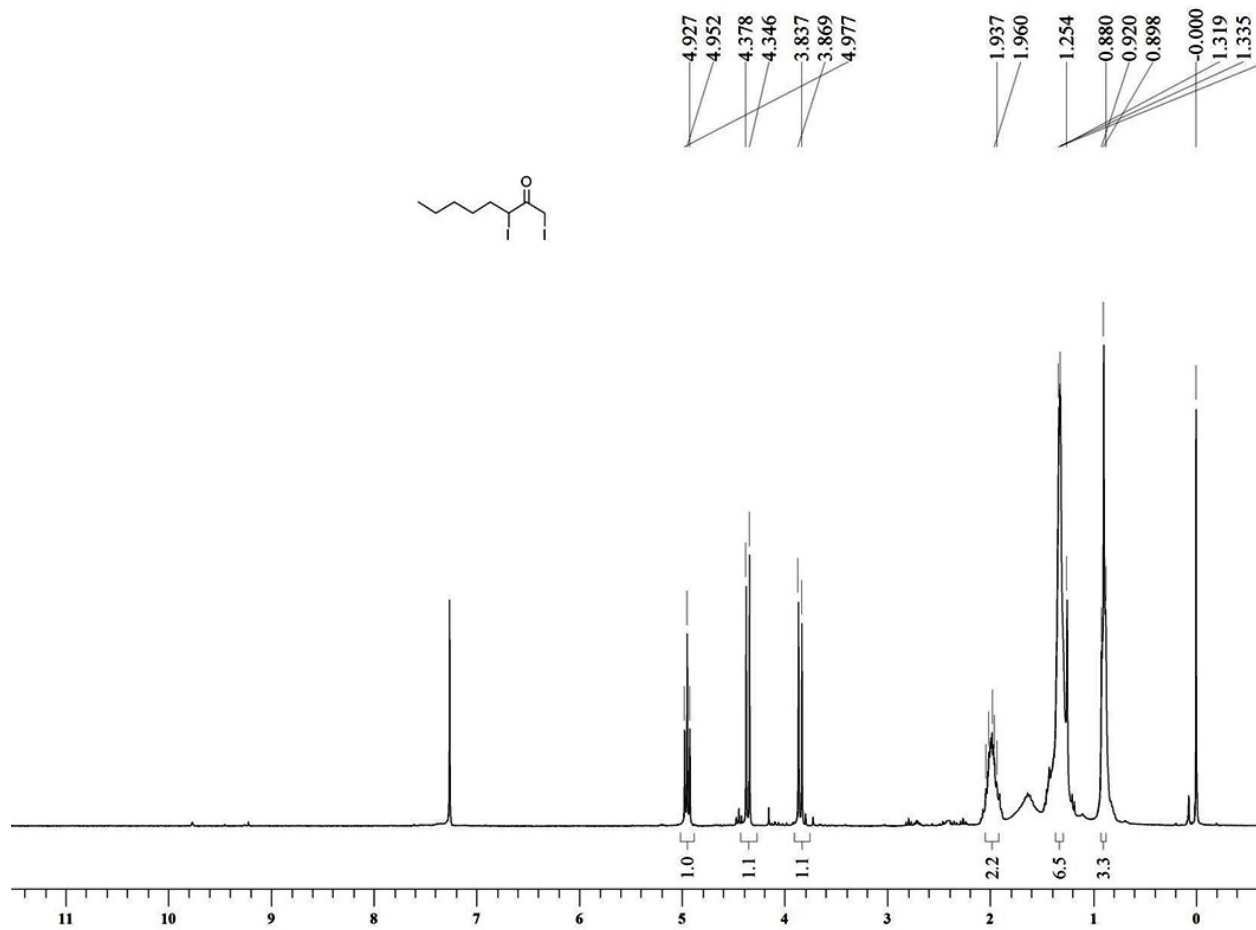

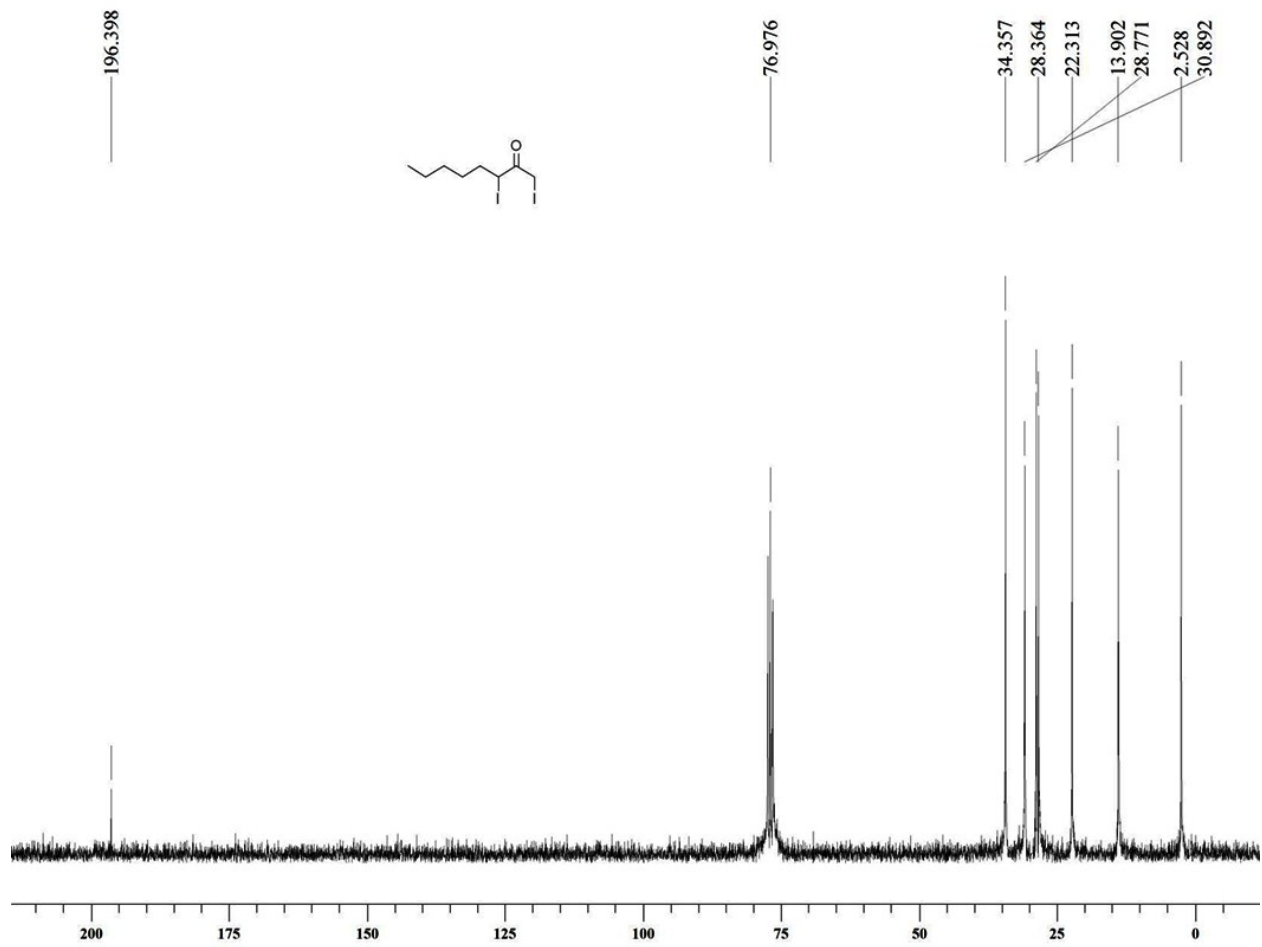

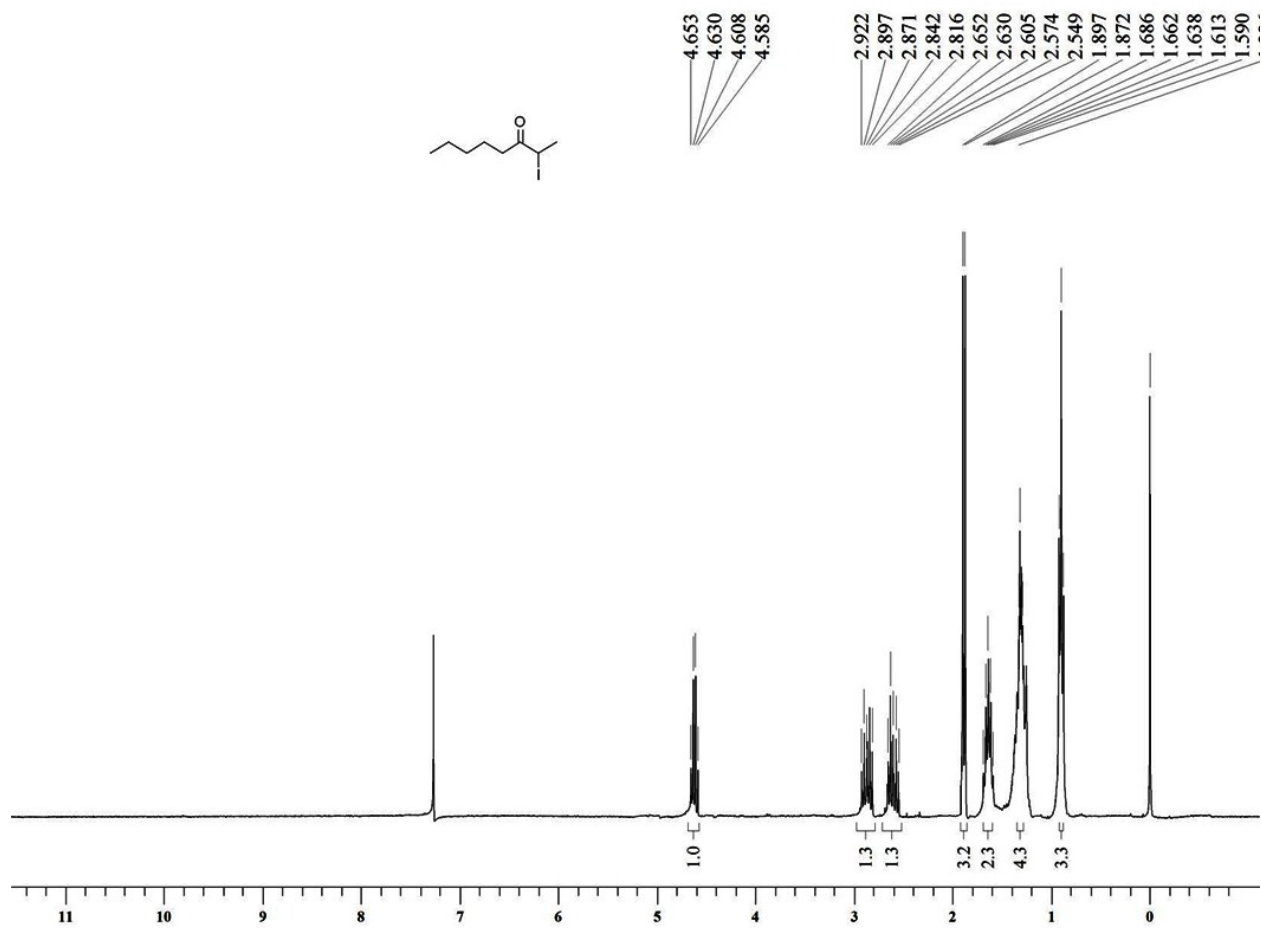

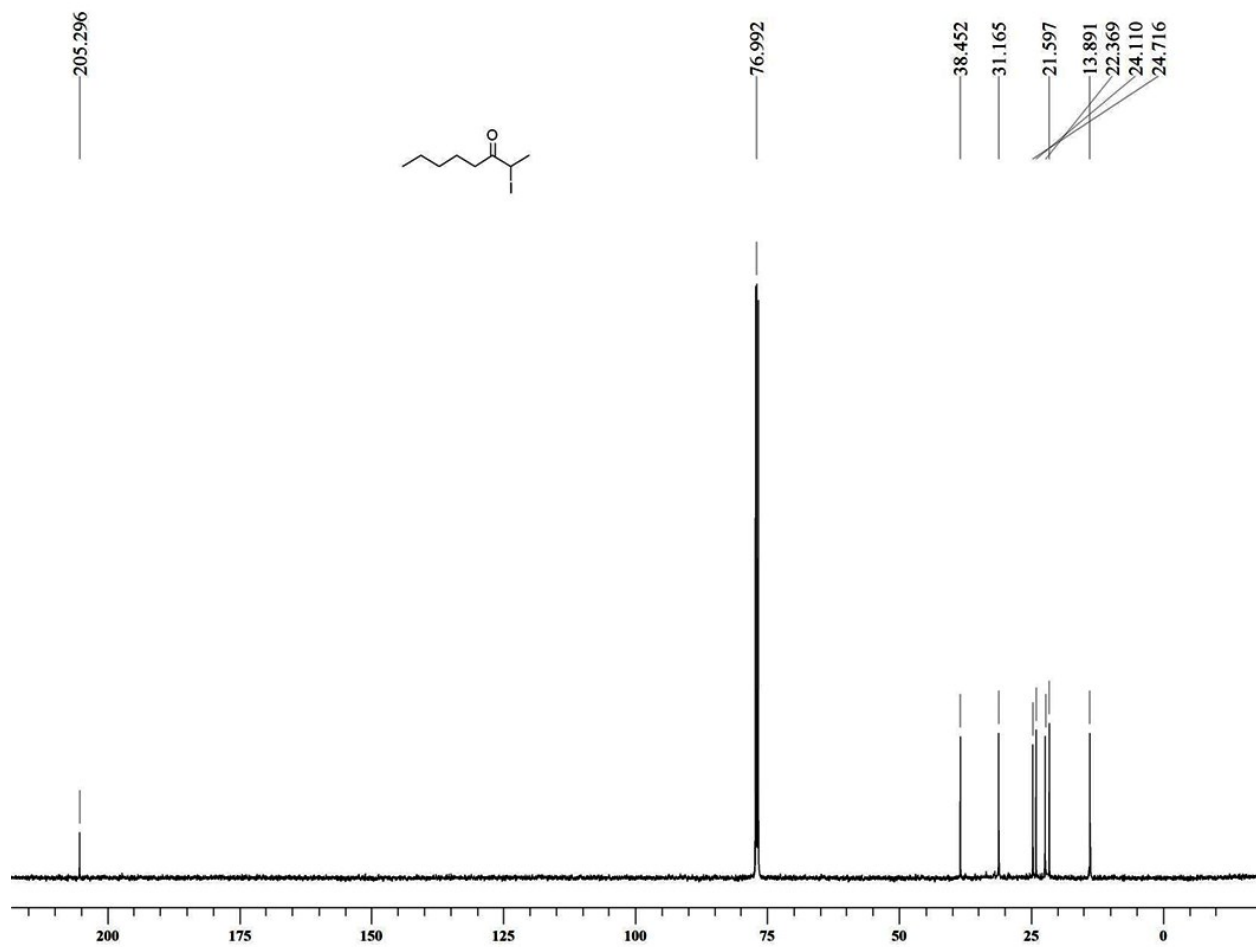

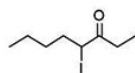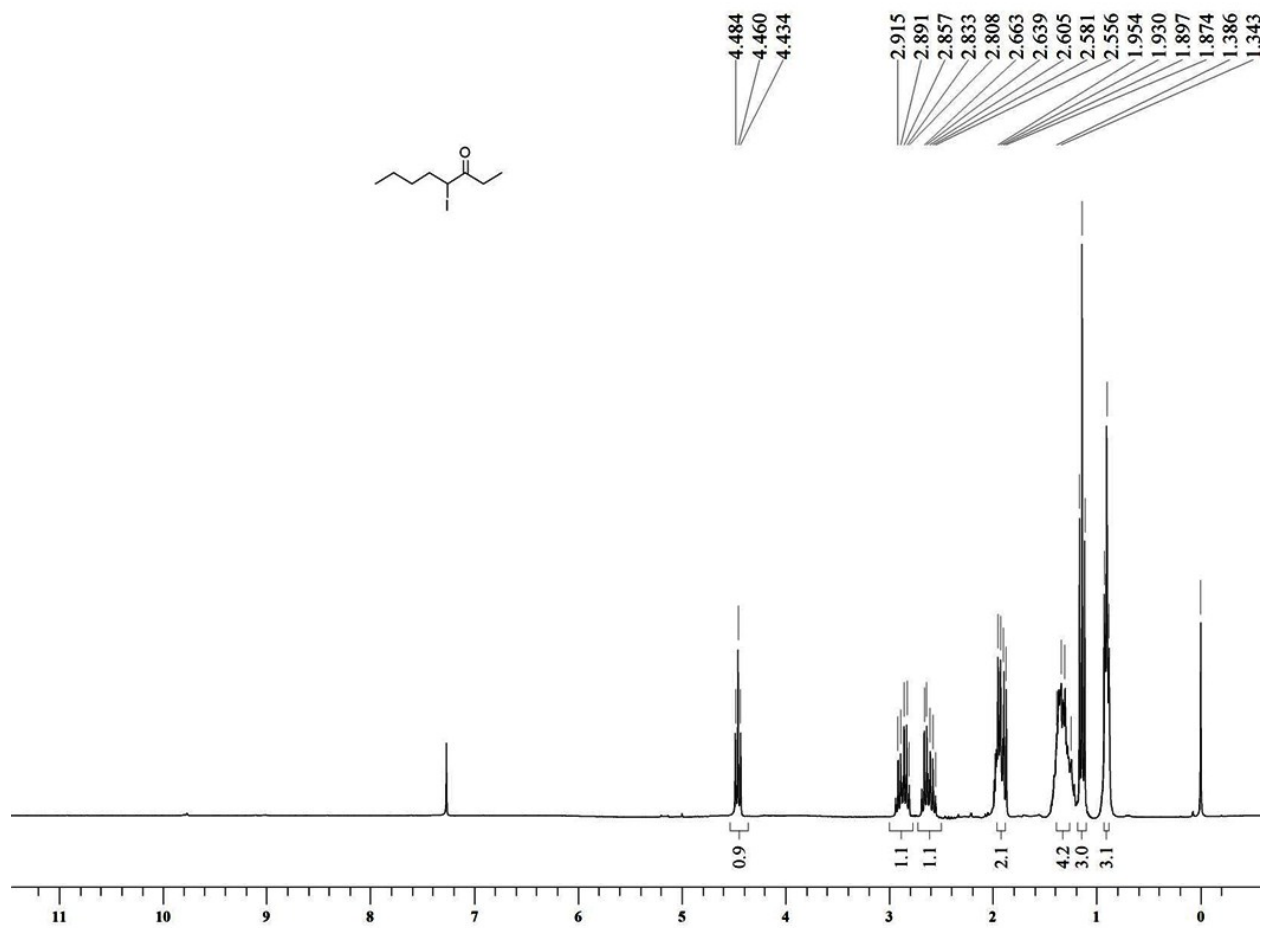



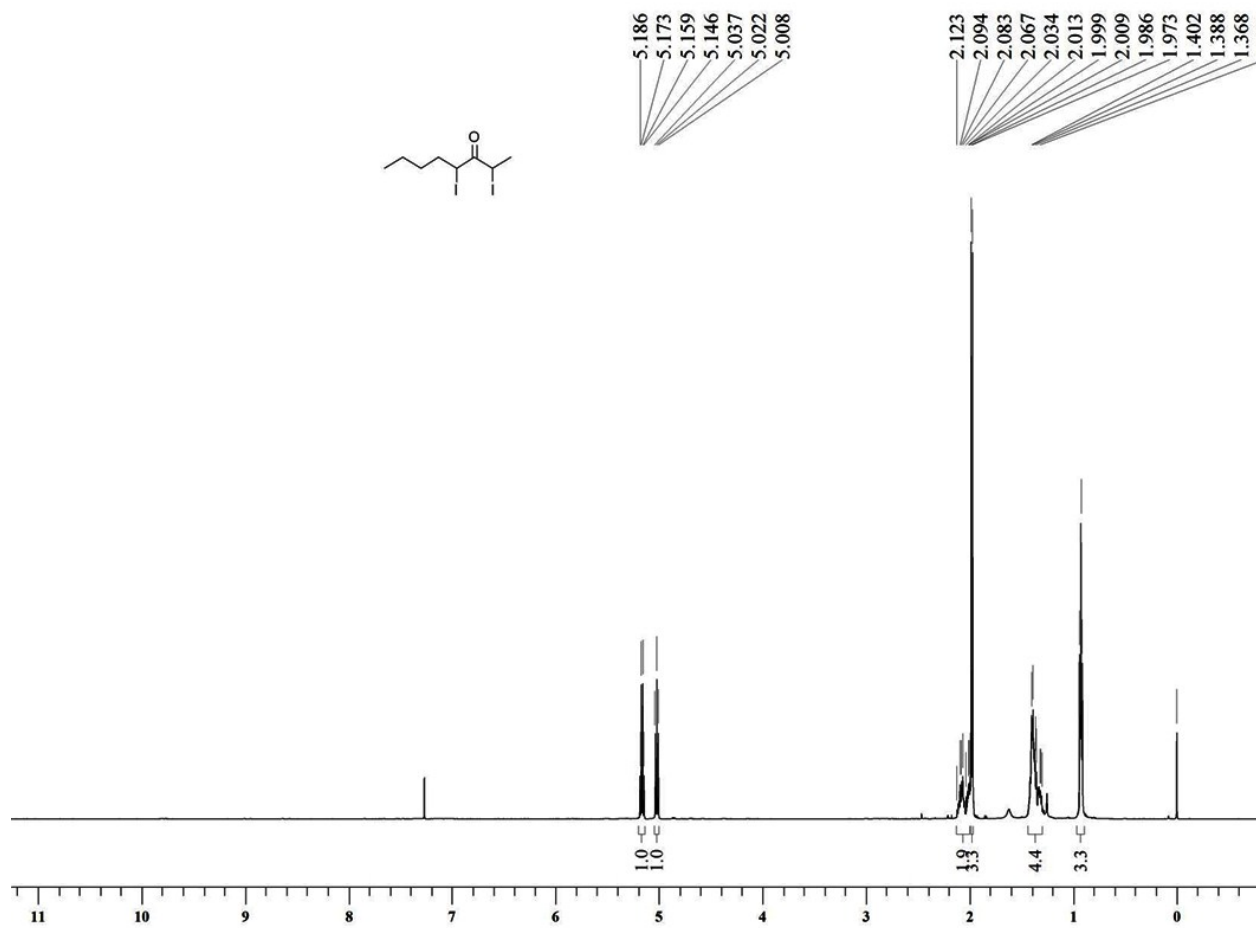

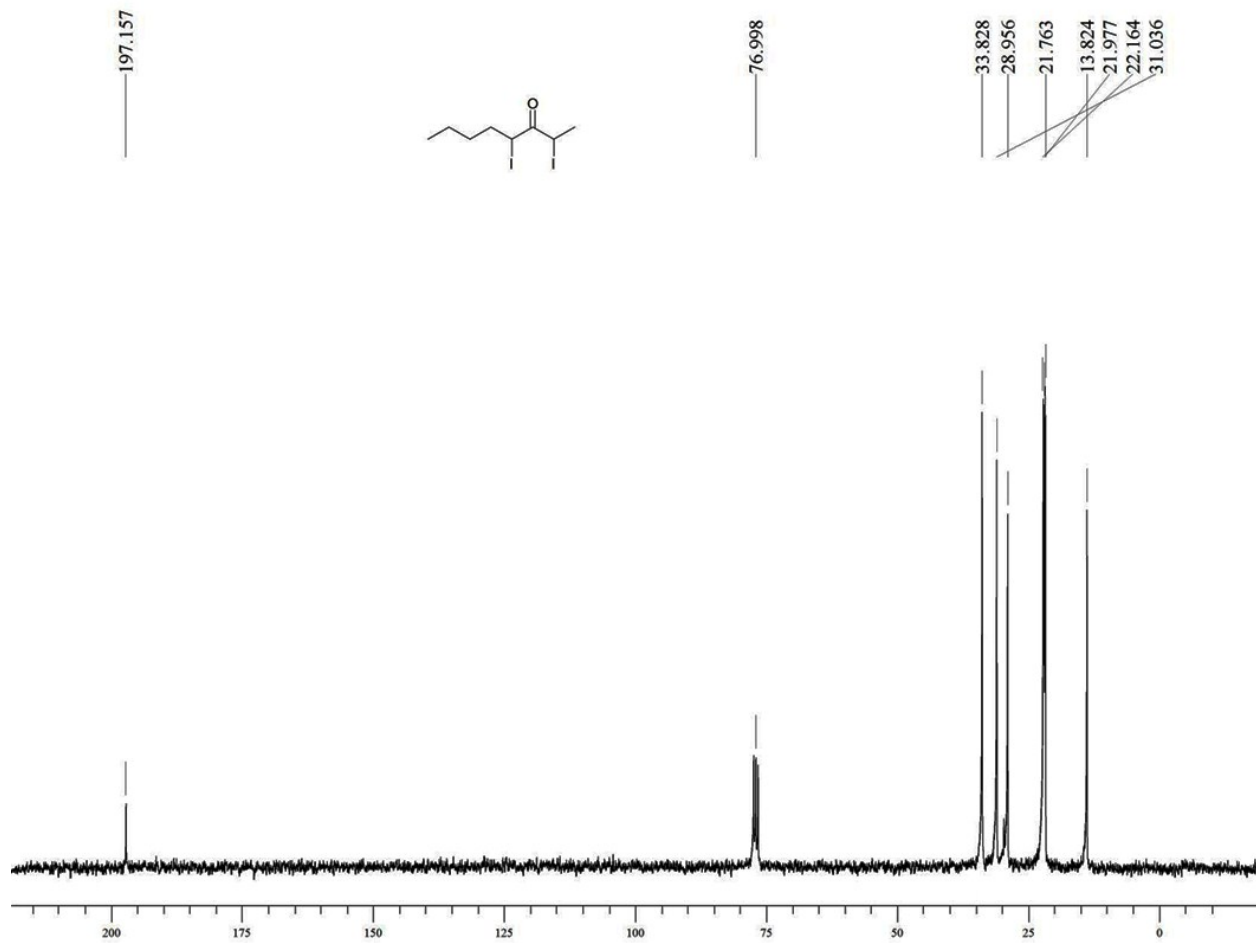

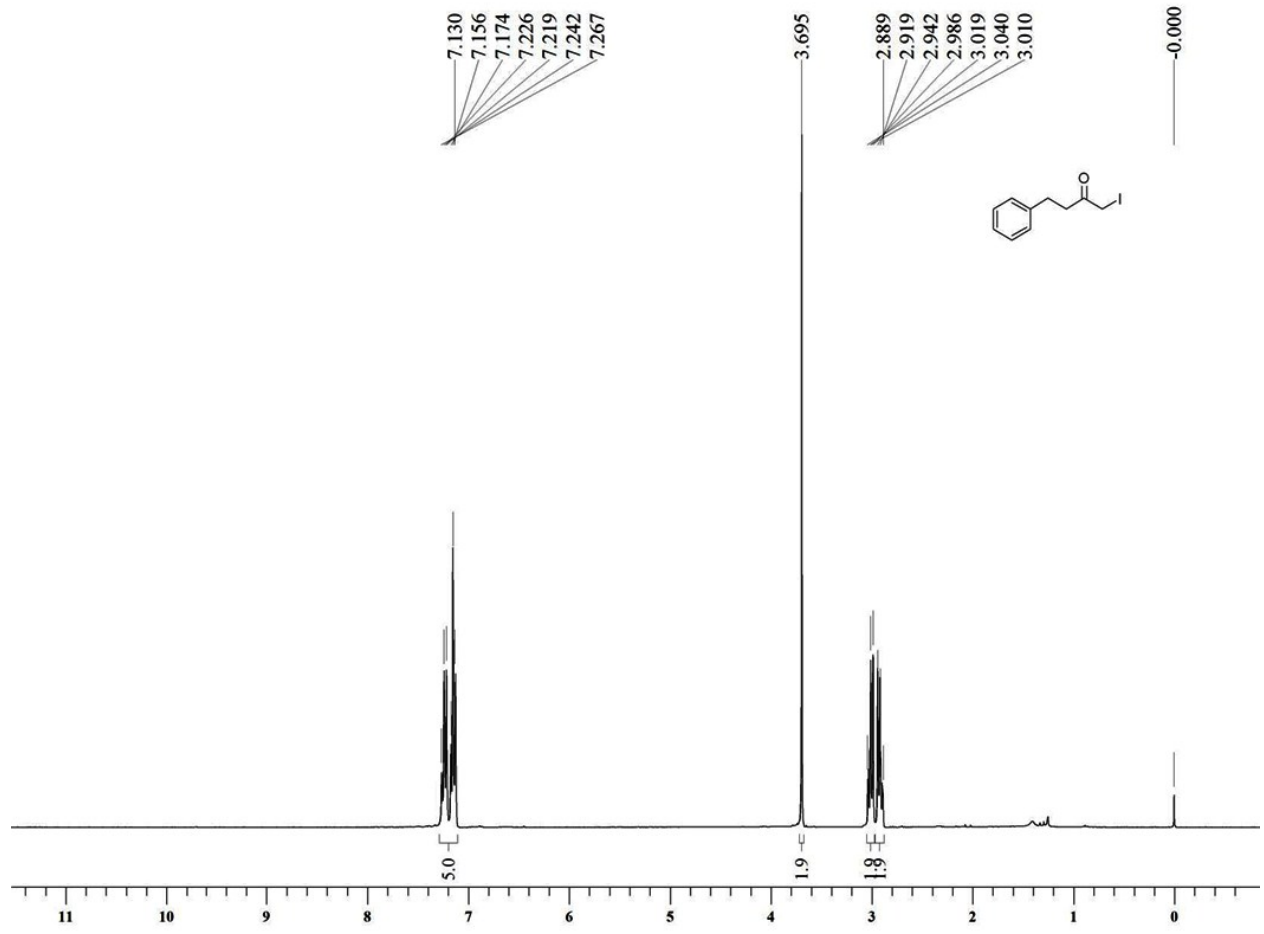

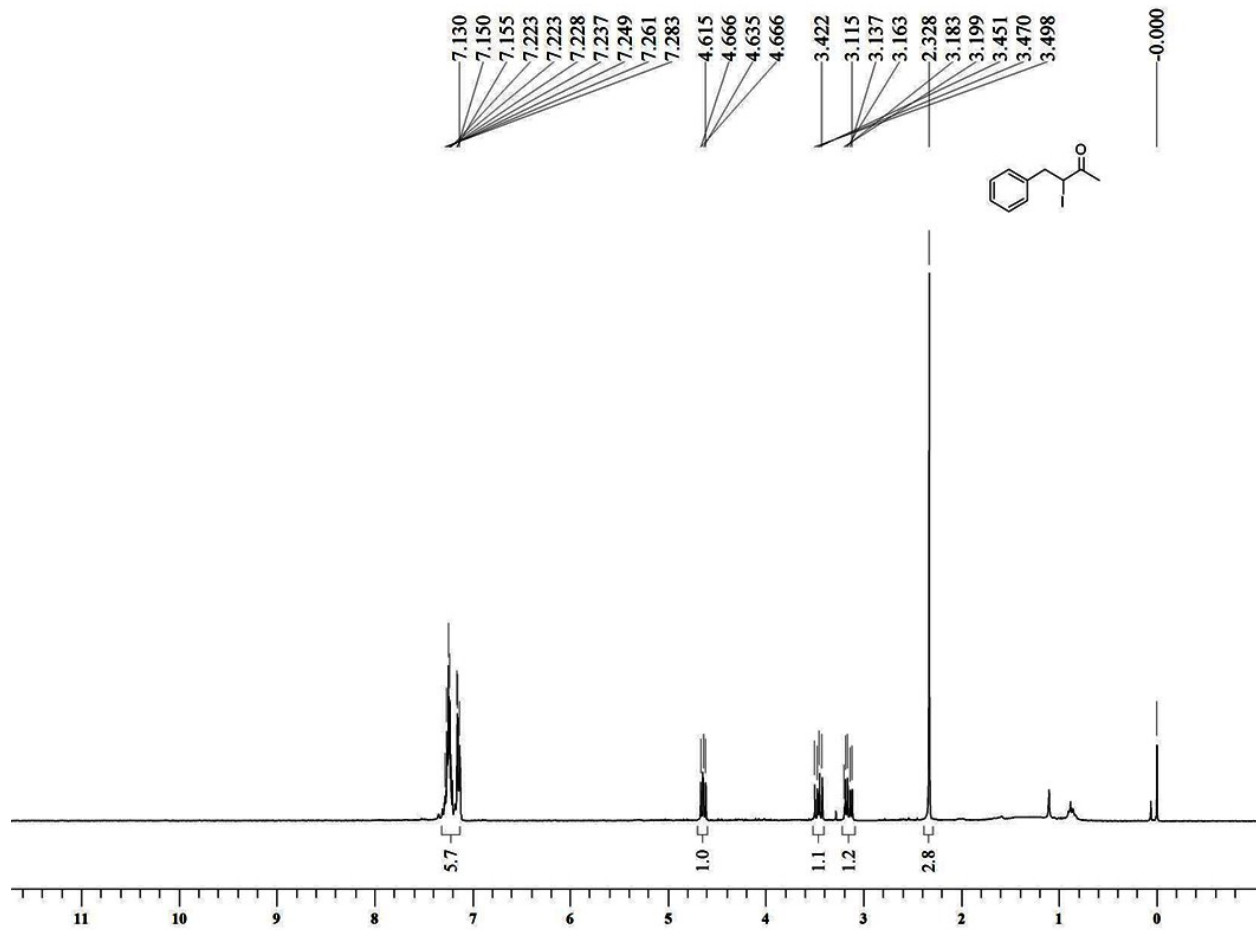

**References:**

- 1 P. R. Olivato, S. A. Guerrero and R. Rittner, *Magn. Reson. Chem.*, 1987, **25**, 179-180.
- 2 O. T. Alexander, M. B. Alexander, M. P. Maxim, A. S. Zoya, V. C. Vladimir and I. N. Gennady, *Synthesis*, 2009, 4159-4166.
- 3 M. Harikrishna, H. R. Mohan, P. K. Dubey, M. Shankar and G. V. Subbaraju, *Synth. Commun.*, 2012, **42**, 1288–1305.
